# 1 **Agewise mapping of genomic oxidative DNA modification demonstrates oxidative-driven** 2 **reprogramming of pro-longevity genes**

3

4 Lynn Htet Htet Aung<sup>1</sup>, Yin Wang<sup>1\*</sup>, Zi-Qian Liu<sup>1</sup>, Zhe Li<sup>1</sup>, Zhongjie Yu<sup>1</sup>, Xiatian Chen<sup>1</sup>, Jinning  
5 Gao<sup>1</sup>, Peipei Shan<sup>1</sup>, Zhixia Zhou<sup>1</sup>, Peifeng Li<sup>1\*</sup>

6

7 <sup>1</sup>Center for Molecular Genetics, Institute for Translational Medicine, College of Medicine, Qingdao  
8 University, Qingdao 266021, China.

9

10 \*Correspondence: Peifeng Li and Yin Wang, e-mail: lipf@qdu.edu.cn; address: Center for  
11 Molecular Genetics, Institute for Translational Medicine, Qingdao University, 38 Dengzhou Road,  
12 Qingdao, 266021, Shandong, China.

13

14

## 15 **Summary**

- 16 • We developed an algorithm to map the oxidative DNA damage at single-base resolution.
- 17 • Oxidative DNA damage landscape in *C. elegans* illustrated an age-specific pattern in terms of  
18 motifs, chromosomal distribution, and genomic features.
- 19 • Oxidative modification in older worms occurred higher frequency at the sex chromosome, with  
20 the preference for promoter and exon regions.
- 21 • Oxidative modification in promoter regions of pro-longevity genes was negatively associated with  
22 their expression, suggesting the oxidative-driven transcript reprogramming of pro-longevity genes in  
23 physiological ageing.

24

25

## 26 **Abstract**

27 The accumulation of unrepaired oxidatively damaged DNA can influence both the rate of ageing and  
28 life expectancy of an organism. Mapping oxidative DNA damage sites at whole-genome scale will  
29 help us to recognize the damage-prone sequence and genomic feature information, which is  
30 fundamental for ageing research. Here, we developed an algorithm to map the whole-genome  
31 oxidative DNA damage at single-base resolution using Single-Molecule Real-Time (SMRT)

32 sequencing technology. We sequenced the genomic oxidative DNA damage landscape of *C. elegans*  
33 at different age periods to decipher the potential impact of genomic DNA oxidation on physiological  
34 ageing. We observed an age-specific pattern of oxidative modification in terms of motifs,  
35 chromosomal distribution, and genomic features. Integrating with RNA-Seq data, we demonstrated  
36 that oxidative modification in promoter regions was negatively associated with the expression of pro-  
37 longevity genes, denoting that oxidative modification in pro-longevity genes may exert epigenetic  
38 potential and thus affect lifespan determination. Together, our study opens up a new field for  
39 exploration of “oxigenetics,” that focuses on the mechanisms of redox-mediated ageing.

40

41 **Key words:** genomic DNA oxidative modification; ageing; Single-Molecule Real-Time (SMRT)  
42 sequencing; genomic landscape; oxigenetics; longevity genes; *Caenorhabditis elegans*

43

#### 44 **Introduction**

45 Ageing is characterized by a series of changes at both cellular and molecular levels, including  
46 senescence, telomere shortening, and changes in gene expression, that lead to impaired functions and  
47 increased vulnerability to death (Collado et al.; Lopez-Otin et al., 2013). Although the molecular basis  
48 of ageing has been intensively studied for decades, few promising conclusions regarding the  
49 underlying mechanisms and anti-ageing treatments, have been reached. Recent studies in multiple  
50 organ systems suggest that the rate of ageing is determined by both genetic and environmental factors  
51 (Fallin and Matteini, 2009; Rando and Chang, 2012; Speakman et al., 2015). One of the well-  
52 established theories for ageing is that of the accumulation of damaged DNAs, which sees aging as a  
53 consequence of the unrepaired accumulation of naturally occurring oxidative DNAs (Cadet and  
54 Davies, 2017; Cooke and Evans, 2007; Liochev, 2013; Pérez et al., 2009). However, some studies  
55 have shown that oxidative DNA damage plays a subtle role in normal ageing; rather it influences the  
56 pathological phenotypes experiencing chronic oxidative stress (Salmon et al., 2010; Zawia et al.,  
57 2009). Hence, studying the genetic basis of longevity and healthy ageing in model organisms will  
58 provide important biological insights to understand the impact of oxidative DNA damage on  
59 physiological ageing.

60 Oxidative DNA damage is an inevitable consequence of cellular metabolism, with gradually  
61 increased levels in organismal ageing due to age-associated deterioration in repair mechanisms  
62 (Collado et al.; Cooke et al., 2003; Lopez-Otin et al., 2013). Among more than 20 identified oxidative  
63 DNA base lesions, 8-oxo-2'deoxyguanosine (8-OHdG) is the most common and well-studied

64 biomarker for oxidative DNA damage (Cooke et al., 2003; Thompson, 2004; Wallace, 2002). 8-  
65 OHdG can be quantified in tissue as well as in body fluids, such as urine, blood, and cerebrospinal  
66 fluid by HPLC-based analysis (Lagadu et al., 2010; Weimann et al., 2002), and specific antibody  
67 assays (Park et al., 1992). However, identification of specific genomic locations or oxidized genes  
68 are yet to be achieved. Previously, we identified that oxidative modification in miR-184 associates  
69 with the 3' UTRs of Bcl-xL and Bcl-w that are not its native targets. The mismatch of oxidized miR-  
70 184 with Bcl-xL and Bcl-w initiates apoptosis in cardiomyocytes (Wang et al., 2015). This study  
71 highlights the critical need for the localization of oxidative modification in the genome. Therefore,  
72 for an in-depth analysis of ageing-associated oxidative DNA damage and to understand the molecular  
73 mechanisms underlying ageing, it is imperative to map the oxidized bases in a whole-genome scale,  
74 which is fundamental for identification of damage-prone and inefficiently repaired regions of DNA.  
75 Here, we pursued the whole genomic 8-OHdG landscape in *C. elegans* at different age periods to craft  
76 an oxidative DNA damage map of physiological ageing

77         Recently, several methods for whole-genome oxidative DNA mapping have been reported  
78 (Ding et al., 2017; Poetsch et al., 2018; Wu et al., 2018; Yoshihara et al., 2014); nonetheless, all these  
79 studies faced the limitation of zooming into single-base resolution and accurately sequence high-GC-  
80 rich regions. Single-Molecule Real-Time (SMRT) sequencing (PacBio) can achieve higher accuracy  
81 for GC-rich regions, where 8-OHdG modification frequently takes place (Wu et al., 2018), and is able  
82 to provide single-base resolution with longer subread lengths. Moreover, SMRT is highly efficient by  
83 the simultaneous detection of multiple forms of damaged DNA bases (Bickhart et al., 2017; Clark et  
84 al., 2011; Flusberg et al., 2010; Rasko et al., 2011). Recently, SMRT technology was updated to its  
85 second-generation Sequel I and II platforms, which perform  $\sim 8$  to  $8^2$  times more efficiently than its  
86 predecessor (RSII), depending on the sequencing mode and chemistry (Ardui et al., 2018; Wenger et  
87 al., 2019). However, the feasibility of using Sequel in the detection of 8-OHdG modification has not  
88 yet been verified. Therefore, we attempted to map the genome-wide architecture of oxidative  
89 modification using SMRT Sequel platform.

90         Here, for the first time, we report the whole genomic oxidative landscape of *C. elegans* at  
91 different age groups at single base-pair resolution. Furthermore, we identified several age-specific 8-  
92 OHdG modified genes that are involved in developmental and biosynthesis pathways. We observed  
93 that the effects of oxidative modification in longevity regulating genes can be age-specific, and that  
94 oxidative modification can epigenetically reprogram the expression of pro-longevity genes, which  
95 eventually determine life- as well as health-span. Together, our study brings critical insights into the

96 genetic mechanism of ageing mediated by oxidative DNA damage, which we believe is a whole new  
97 field of exploration for personalized medicine that we would like to term as “oxigenetics.”

98

## 99 **Results**

### 100 **SMRT Sequel platform is suitable for the detection of 8-OHdG modification**

101 Previous study has shown that oxidative DNA damages can be detected in SMRT sequencing by their  
102 specific polymerase kinetic signatures (Clark et al., 2011). To calibrate the kinetic signature of the 8-  
103 OHdG modification in the Sequel platform, we sequenced the synthetic oligonucleotide containing  
104 two 8-OHdGs (Fig. S1A and B, Table S1). We measured each base position (n=465) times in average  
105 and determined the IPD ratio and coverage of each base position as described (Schadt et al., 2013).  
106 The statistically significant difference between IPD value at each position with the in-silico control  
107 is determined by the modification score ( $-\log_{10} p$ -value). The putative 8-OHdG events were detected  
108 at positions 34 and 57 of the synthetic oligonucleotides with strict filtration criteria determined by  
109 IPD ratio, modification score, and coverage (Fig. S1C and D) and the true positive and false positive  
110 detection rates of our approach were analysed (Fig. S1D). Compared to previously established  
111 protocol (Clark et al., 2011), we improved the analysis algorithm in two aspects: (i) to minimize the  
112 false positive rate, we included not only the IPD ratio, but also the statistically significant modification  
113 score ( $FDR < 0.05$ ) to our threshold for identification of 8-OHdG signal, and (ii) to reduce the bias  
114 of undetected surrounding base modification, we included the IPD ratio value of +1bp and -1bp to  
115 our filtration criteria.

116 At the whole-genome level, we sequenced 8-OHdG modification sites in gDNA extracted from  
117 the pcDNA3.1 plasmid treated with different concentrations of H<sub>2</sub>O<sub>2</sub> and compared the number of  
118 damage sites. We found an increase in 8-OHdG-modified sites along with H<sub>2</sub>O<sub>2</sub> concentration, but  
119 when we treated the sample with Ogg1, which can specifically cleave 8-OHdG (van der Kemp et al.,  
120 1996), a concomitant decrease in 8-OHdG were observed by both SMRT sequencing and dot-blot  
121 assay (Fig. S2A and B). The presence of 8-OHdG in different samples was confirmed by HPLC-  
122 MS/MS (Fig. S2C). Although 8-OHdG was thought to have variable motifs (Tang et al., 2019), our  
123 data indicated that 8-OHdG occurred in higher frequency next to the downstream “GG/GC” sequence  
124 in the plasmid genome (Fig. S2D and E). Our data showed that 8-OHdG could influence the IPD  
125 value of surrounding bases (Fig. S2D), in particular an adjacent adenosine “A” (Fig. S3). Therefore,  
126 to certify that the signal in adjacent “A” was due to the influence of the surrounding 8-OHdG  
127 modification, we constructed a point mutation to an 8-OHdG signal-positive “G” site adjacent to an

128 “A.” As anticipated, no modification signal was detected in the mutated sample (Fig. S3),  
129 corroborating that the signal was due to the effects of 8-OHdG modification. Nevertheless, given that  
130 the IPD value at individual positions can still be influenced by surrounding modifications, we  
131 excluded the “G” within +6bp and -6bp next to 6mA or 4mC modification which are the commonly  
132 detected genomic modification, from our analyses.

133

### 134 **The repertoire of oxidative modifications in *C. elegans* genome displays age-specific patterns**

135 For the next level of complexity, we attempted to understand the genomic DNA oxidation landscape  
136 and its association with ageing in *C. elegans*, one of the widely accepted model organisms for ageing  
137 studies. To this end, we sequenced unamplified gDNA extracted from the 1-, 10-, and 20-day-old *C.*  
138 *elegans* with above 100-fold genome coverage (Fig. 1A, Table S1). The experimental workflow and  
139 the number of biological replicates used in this study were summarized in Fig. S4 and Fig. 1A. We  
140 observed that oxidatively modified sites account for 0.01 %, 0.45 %, and 0.15 % of the whole genome  
141 in D1, D10, and D20, respectively (Fig. 1B and Fig. 2A). We then profiled the density of 8-OHdG  
142 sites normalized to total guanines in the *C. elegans* genome, the relative frequency of 8-OHdG (8-  
143 OHdG/ G) in D10 was 3-fold higher than that of D20 and 10-fold higher than that of D1 (Fig. 1C),  
144 with an overlap of 0.009% of 8-OHdG sites among all age groups (Fig. 1D). Circos plots displayed  
145 the global distribution of 8-OHdG across the *C. elegans* genome (Fig. 1E). On motif analysis, TGGGT  
146 was the most enriched motif in the D1 group, while TGGAT was the most frequent motif in both D10  
147 and D20 groups (Fig. 1F, Table S2). These motifs were very similar to the 8-OHdG motifs of  
148 (GGGGT) *S. cerevisiae* (Wu et al., 2018) but vastly different from the 6mA motifs of (AGAA and  
149 GAGG) *C. elegans* (Greer et al., 2015a) and (GGAAT) human glioblastoma cell lines (Poetsch et al.,  
150 2018), indicating that our identified motifs are specific and predominant in *C. elegans* 8-OHdG  
151 modification. The frequency of 3' or 5' base next to 8-OHdG is highly variable between young and  
152 older worms. In young worms, the frequency of each base 5' to 8-OHdG was 30% G, 30% T, 30% A  
153 and 10% C, and that of each base 3' to 8-OHdG was 40% G, 30% T, 15% A and 15% C; however,  
154 for the older worms, the highest frequency of G (40%) was observed 5' to 8-OHdG, and A (30%)  
155 achieved the highest frequency 3' to 8-OHdG. The motif identified in our study is consistent with  
156 findings in mouse and yeast genome, where there is a high abundance of GG dimmer in regions  
157 containing 8-OHdG sites.

158

159 **The trends and characteristics of 8-OHdG modification show heterogeneity among different**

160 **age groups**

161 To understand whether oxidative modification has any chromosomal dominant, we analyzed the  
162 frequencies of 8-OHdG across all six chromosomes. The chromosomal distribution of 8-OHdG  
163 showed a different trend between young and older worms (Fig. 2B). Of the 6 chromosomes, ChX had  
164 the highest frequency of 8-OHdG modification in older worms (D10 and D20), whereas ChI was the  
165 lowest; conversely, the trend in young worms was completely opposite to the one observed in older  
166 worms (Fig. 2C), demonstrating that the chromosomal distribution pattern of 8-OHdG in *C. elegans*  
167 genome is age-specific.

168 To determine putative biological functions of 8-OHdG modification, we examined 8-OHdG  
169 distribution in genomic features divided into gene bodies, including exon, intron, promoters, 5'UTR,  
170 3'UTR regions, and intergenic regions. The highest % of modification for D1 is at the intergenic  
171 (non-coding) regions; however, for D10 and D20, the highest % is seen at exon (coding) regions (Fig.  
172 2D). The dynamics of 8-OHdG distribution in different genomic regions of each chromosome show  
173 a similar trend for all age groups (Fig. 2E and F).

174 To investigate whether 8-OHdG modification shows sequence preference for different  
175 genomic regions, we performed motif analysis using the sequence information of -2bp and +2bp next  
176 to the modification. As described in Figure S5A-C, TTGGT is the most frequent motif found in  
177 promoter, 3'UTR, 5'UTR, and TF-binding regions of D1, whereas TTGAT is the most frequent one  
178 in D10 and D20 groups. However, for exon regions, TTGAT is the most frequent motif for all age  
179 groups. Between D10 and D20, the 8-OHdG motifs for gene body, exon, promoter and 3'UTR are  
180 similar but those for 5'UTR and TF-binding regions are different. Overall, although 8-OHdG  
181 modification sites indicated significant different motifs between young and older worms, it did not  
182 show significant different sequence preferences among different genomic features except TF-binding  
183 regions of older worms.

184

185 **Oxidative modification patterns change with ageing**

186 Upon analyzing the 8-OHdG modification within the coding regions, we found that 11% (2,124), 92%  
187 (18,571), and 72% (14,579) of annotated genes in 1-day-old, 10-day-old, and 20-day-old respectively  
188 have at least one 8-OHdG sites. Approximately 9% (1,857) of oxidatively modified genes were  
189 overlapped among three age groups, while 60% (12,242) were overlapped between D10 and D20  
190 groups (Fig. 3A and B, and Table S3). The trend of 8-OHdG modified genes across different  
191 chromosomes is significantly different between young and older worms; for 1-day old group, the

192 highest number of oxidatively modified genes are found in ChIII, while in 10- and 20-day-old group,  
193 the highest number of oxidatively modified genes were in ChV (Fig. 3B and C, and Fig. S6A-C). To  
194 understand whether oxidative DNA damage occurred more frequently in coding regions of specific  
195 chromosomes, we analyzed the frequency of 8-OHdG (+) genes relative to the total number of genes  
196 occupied in each chromosome (Fig. 3D). The highest 8-OHdG (+) genes occupancy was found in  
197 ChX for all age groups (Fig. 3D). In D1, the 8-OHdG (+) genes occupancies in ChI and ChIII were  
198 higher than that of ChII, while in the older groups (D10 and D20), those in ChI and ChIII were lower  
199 than that of ChII (Fig. 3D). These data denoted a different trend of chromosomal 8-OHdG (+) gene  
200 distribution among different age groups.

201 To investigate the functional intuitions of 8-OHdG modification in physiological ageing  
202 (Collado et al.; Lopez-Otin et al., 2013), we categorized age-specific 8-OHdG-modified genes using  
203 the *C. elegans* gene ontology (GO) resource (Ashburner et al., 2000; Van Auken et al., 2009). We  
204 noted that these genes were highly enriched in biosynthetic and transcriptional regulation pathways;  
205 in particular, D10-specific 8-OHdG-modified genes were enriched in bio-synthesis pathways  
206 including ribosomes, spliceosome, oxidative phosphorylation, endocytosis, basal transcription factor,  
207 TGF-beta signalling pathway, and mucin-type O-glycan biosynthesis, while D20-specific genes were  
208 enriched in proteolysis pathways (Fig. 3E). Interestingly, we noticed that top 8-OHdG modified genes  
209 identified in our samples were not yet functionally characterized so far (Table S4-6). These data  
210 highlight the importance of whole-genome 8-OHdG localization, which can facilitate to identify  
211 novel genes involved in redox mediated ageing. Upon analyzing the functional regions, we observed  
212 that 8-OHdG modifications are mainly present at the promoter and exon regions of 10- and 20-day-  
213 old worms, but, predominantly distributed at the intron regions of 1-day-old worms (Fig. 3F, Fig.  
214 S6D-F and Table S4-6); suggesting that 8-OHdG modification may affect gene regulation in an age-  
215 specific manner.

216

### 217 **The differentially 8-OHdG modified genes are annotated to longevity regulating pathways**

218 Further, we examined the differentially oxidized genes (DOGs) between young and older worms (Fig.  
219 4A). DOGs across different chromosomes demonstrated a similar trend in all groups with a  
220 comparatively high frequency in the sex chromosome (Fig. S7A). The differential 8-OHdG sites were  
221 highly observed in the promoter and exon regions (Fig. S7B-D). Gene Ontology analysis indicated  
222 that the sets of DOGs were enriched in multiple signalling pathways related to cellular processes,  
223 metabolism, and environmental information processing (Fig. 4B and Fig. S8A-C). Functional

224 classification using KEGG databases indicated that DOG clusters were highly enriched in oxidative-  
225 stress related pathways, including FoxO, MAPK, ErbB, AGE-RAGE signalling, and longevity  
226 regulating pathways (Fig. 4C-F), suggesting that 8-OHdG modification indeed plays a key role in  
227 longevity regulation.

228

### 229 **The oxidative DNA damage in promoter regions is negatively correlated with the expression of** 230 **pro-longevity genes**

231 To identify the modification status of longevity regulating genes, we analyzed the 8-OHdG  
232 distribution in previously identified longevity regulating genes deposited at the animal aging and  
233 longevity database (AnAge) (Uno and Nishida, 2016). To examine the influence of oxidative  
234 modification on ageing, we divided longevity regulating genes into pro- and anti-longevity genes and  
235 plotted them against the occupancy of 8-OHdG in different age groups. Gene set enrichment analysis  
236 showed that the oxidative modification in pro-longevity and telomere maintenance genes increased  
237 with age (Fig. 5A and B). In young worms, we identified very few 8-OHdG positive sites in longevity  
238 regulating genes, however in the older worms, we found higher frequency of oxidative damage sites  
239 especially in pro-longevity genes, with predominantly localized in promoter regions (Table S7 and  
240 Fig. 5C). The 8-OHdG enrichment in longevity regulating genes among different age groups was  
241 further confirmed by 8-OHdG-IP-qPCR analysis (Fig. S9). Studies have suggested that age-  
242 associated changes in gene expression could be one of the key mechanisms of ageing (de Magalhaes  
243 et al., 2009; Harries et al., 2011; Kawahara et al., 2009); hence, to detect the relationship between 8-  
244 OHdG modification and expression levels of longevity regulating genes, we performed RNA-seq on  
245 different age *C. elegans*. As expected, the genome-wide transcriptional map analyzed from RNA-Seq  
246 data indicated an age-specific pattern of transcript expression in the *C. elegans* genome evidenced by  
247 differential expression profiles among different age groups (Fig. S10A-D). Similarly, the  
248 transcriptional profile of genes involved in top-5 signaling pathways enriched by DOGs also showed  
249 significant differences among diverse age groups (Fig. S11A and B). Further, correlation analysis  
250 showed a negative correlation between 8-OHdG modification in promoter with the expression of pro-  
251 longevity genes (Fig. 5D-F and Fig. S12A and B), suggesting that 8-OHdG modification at promoter  
252 regions may possess epigenetic potential.

253

## 254 **Discussion**



255 The underlying cause of ageing remains one of the central mysteries of biology. The oxidative stress  
256 theory of ageing convinces that both rates of ageing and life expectancy of an organism are largely  
257 influenced by the levels of accumulation of oxidative damage (Lin and Flint Beal, 2003). Hence,  
258 locating 8-OHdG at whole genomic level will provide a better understanding of the effects it has on  
259 normal ageing. *C. elegans* is one of the well-established premier model systems for aging research  
260 due to its short lifespan, relatively small genome size and simple body plan. In the current study, we  
261 mapped the whole-genome landscape of oxidative modification in *C. elegans* at different age periods  
262 and observed an agewise damage-driven reprogramming of pro-longevity genes. Our data set the  
263 stage for further investigation that will improve the understanding of the oxigenetic basis of ageing.

264 Our data showed that SMRT sequencing in Sequel platform is an efficient approach for  
265 mapping 8-OHdG sites at single-base resolution. As compared to other 8-OHdG sequencing methods,  
266 SMRT allows to assign the 8-OHdG mediated IPD signatures and motifs, which is different from  
267 other type of base modification under the high sequencing depth (Ardui et al., 2018). Besides,  
268 previous methods using second-generation sequencing require an ideal control sample, in which all  
269 the identified modification regions were based on mapping peaks relative to control. In addition, the  
270 absence of chemical tagging could improve the sequencing efficiency and accuracy, and maintain the  
271 physical and chemical integrity of DNA, providing more genuine information (Bryan et al., 2014;  
272 Clark et al., 2011; Ding et al., 2017; Poetsch et al., 2018; Schibel et al., 2010; Wu et al., 2018). Also,  
273 it can directly localize the medication and can identify individual bases and their modification  
274 simultaneously. Furthermore, SMRT sequencing can achieve higher accuracy for GC rich regions,  
275 where 8-OHdG modification frequently takes place (Wu et al., 2018). However, the drawback of this  
276 approach is the kinetic variation due to 8-OHdG modification or other unknown modifications that  
277 can influence the IPD values of both the upstream and downstream bases, increasing the false positive  
278 rate (Clark et al., 2011; Flusberg et al., 2010). Though we have filtered out the known 6mA and 4mC  
279 modification signals in our analysis, there are still many other known and unknown DNA  
280 modifications to be ruled out. Hence, further research addressing the accuracy of detection using  
281 integrated experimental and computational approaches is still required to efficiently map oxidative  
282 DNA damage at single-base resolution level.

283 The whole-genome 8-oxoG map in yeast suggests that greater oxidative damage distribution is  
284 determined by chromatin architecture, transcription activity, and chemical oxidation potential. In  
285 yeast genome, higher frequency of 8-oxoG was observed within heterochromatin and lower frequency  
286 in euchromatins, and in promoter and exon regions (Wu et al., 2018); whereas in mouse genome,

287 higher accumulation of damage distribution occupied promoter regions (Ding et al., 2017). In contrast,  
288 oxidative damage distribution in human HepG2 cell line at the 10-300 kp resolution showed a reduced  
289 damage in functional regions such as coding, promoters, and transcription factor binding sites  
290 (Poetsch et al., 2018). In contrast, our finding at single-base resolution indicated that oxidative  
291 modification is highly distributed in non-functional regions in young worms, but for older worms,  
292 oxidative damage sites are more frequently identified at functional regions. This discrepancy likely  
293 results from age-specific- or regioselective distribution in oxidative damage sites and repair capacity,  
294 due to species specificity or due to the influence of environment and life-history which shapes the  
295 oxidative damage distribution through the evolutionary aspect (Speakman et al., 2015). Another factor  
296 to consider is that all previous studies observed the oxidative DNA damage at a single age period or  
297 a designated time point; and since oxidative DNA damage itself is a dynamic process, the changes in  
298 oxidative modification pattern throughout the life span might have been missed. Therefore, further  
299 studies conducted at different age periods, with larger samples size, and strict environmental controls  
300 are required to draw the representative landscape of whole-genome oxidative DNA modification  
301 across different species.

302         Although several experimental findings have supported the concept that ageing-associated  
303 cellular changes are due to the accumulation of oxidative DNA damage (Bergamini et al., 2004; Chen  
304 et al., 2007; De Bont and van Larebeke, 2004; Lenaz, 1998; Lin and Flint Beal, 2003), many recent  
305 studies suggest that it could not be the sole cause (Liochev, 2013; Pérez et al., 2009; Sanchez-Flores  
306 et al., 2017) and highlighted the complexity of the mechanisms behind ageing. Thus, an integrated  
307 epidemiological, genetics and epigenetics approach is required for the betterment of biological ageing  
308 research (Fallin and Matteini, 2009; Speakman et al., 2015). Previous studies paid much attention on  
309 the impact of oxidative DNA damage on ageing associated disease including Alzheimer,  
310 cardiovascular diseases and carcinogenesis and undermined the role of oxidative DNA damage in  
311 physiological ageing. Interestingly, our data shows that the frequency of genomic oxidative DNA  
312 modification is the highest in middle age worms and slowly declines as they age, suggesting that that  
313 higher oxidative modification sites are not proportionally correlated with the rate of ageing. This  
314 could be partially explained by age-driven changes in DNA damage tolerance along with their  
315 response to oxidative stress (Pilzecker et al., 2019). Although middle aged worms experienced higher  
316 levels of oxidative stress, they might have better damage tolerance, which can ameliorate the DNA  
317 damage-related biological consequences and can achieve the normal equilibrium at a faster pace  
318 relative to the older worms (Hekimi et al., 2001). In addition, one recent study has shown that transient

319 increase in naturally occurring reactive oxygen species during early development increases stress  
320 resistance and improves redox homeostasis and consequently brings a positive effect on lifespan  
321 regulation (Bazopoulou et al., 2019). However, more studies, including mechanistic ones, are needed  
322 for the deeper understanding of the impact of oxidative DNA damage to the physiological ageing and  
323 health spans.

324 The differential 8-OHdG modified genes are highly enriched in age regulating pathways,  
325 including longevity regulating pathway, and FoxO, ErbB, MAPK, and AGE-RAGE signaling  
326 pathways. These pathways are consistent with the previously reported ageing-dependent signaling  
327 pathways (He et al., 2014; Lapierre and Hansen, 2012), indicating the significance of oxidative  
328 modification in ageing processes. The rate of 8-OHdG modification in key ageing regulating genes is  
329 different among diverse age groups. These modifications are mainly observed in exon and promoter  
330 regions. Studies have reported that age-associated changes in gene expression are one of the key  
331 underlying mechanisms behind the physiologic consequences of ageing (de Magalhaes et al., 2009;  
332 Harries et al., 2011); favourable to these reports, we observed an age-specific pattern of transcript  
333 expression in the *C. elegans* genome. The transcriptional profile of genes involved in pathways  
334 enriched by DOGs showed significant differences among different age groups. These findings are  
335 highly consistent with previous studies where 8-oxoG accumulates in the promoters of regulatory  
336 genes such as VEGF (Pastukh et al., 2015) and p53 (Hyun and Jang, 2014; Ou and Schumacher, 2018)  
337 upon oxidative response and consequently regulate gene expression. Studies demonstrated that  
338 oxidative DNA damage in the promoter region could halt transcription and replication (Cogoi et al.,  
339 2018; Tornaletti et al., 2004), resulting in cellular dysfunction that promotes cellular senescence and  
340 apoptosis (Ou and Schumacher, 2018). Consistently, our data unveiled that 8-OHdG modification in  
341 promoter regions was negatively correlated with the expression of pro-longevity genes, indicating  
342 that 8-OHdG at promoter regions may have epigenetic potential (Fleming et al., 2017). In young  
343 worms, we identified almost none oxidative damage sites in longevity regulating genes, however, in  
344 the older worms, we found higher frequency of oxidative damage sites especially in pro-longevity  
345 genes, suggesting that oxidative modification in pro-longevity genes may have a robust effect on  
346 lifespan determination as compared to anti-longevity genes. Furthermore, our data specify that age-  
347 associated changes in oxidative DNA-damage driven transcript repression exclusively occurs during  
348 adulthood.

349 In summary, our results delineate the feasibility of measuring oxidative sites using PacBio's  
350 Sequel platform. Our findings reveal that oxidative DNA damage can impact longevity regulation in

351 an age-specific manner. Accumulation of oxidative DNA damage in pro-longevity genes of older  
352 worms can repress their expression, mediating organismal ageing. This concept highlights the  
353 previously unappreciated, epigenetic role of oxidative DNA modification on longevity regulation.  
354 However, further research addressing the accuracy of 8-OHdG detection using an integrated  
355 experimental and computational approach is still required to improve the mapping of oxidative DNA  
356 damage at the single-nucleotide resolution level. We believe that our findings provide a  
357 comprehensive data on the oxidative DNA modification map and set the stage to improve our  
358 understanding of the molecular mechanisms of 8-OHdG in ageing, thereby providing the basis to  
359 prolong the youthfulness and lifespan.

360

## 361 **Materials and Methods**

### 362 **Synthetic 8-OHdG containing oligonucleotide sequence**

363 Custom oligonucleotides containing 8-OHdG bases were purchased from Takara Bio Inc. The  
364 sequence information is 5' -GTCGTACGACGTTATTCGTTTCGTCCGACGATC(x)T  
365 ACGACGTTATTCGTTTCGTCC(x)ACGACGGGCTCGGAACGAAAGTTCCGAGCCCGTCGT  
366 CGGACGAAACGAATAACGTCGTACGATCGCGGACGAAACGAATAACGTCGTACGACT-3'  
367 for the forward strand and 5'-AGTCGTACGACGTTATTCGTTTCGTCCGACGATC  
368 GTACGACGTTATTCGTTTCGTCCGACGACGGGCTCGGAACTTTCGTTCCGAGCCCGTCGT  
369 CGGACGAAACGAATAACGTCGTACGATCGTCGGACGAAACGAATAACGTCGTACGAC-3'  
370 for the reversed strand. The "x" denotes for 8-hydroxy-2'-deoxyguanosine (8-OHdG).

371

### 372 **Preparation of plasmid DNA**

373 The Haemagglutinin (HA)-tagged pcDNA3.1(+) plasmid DNA was amplified in *Escherichia coli*  
374 DH5 $\alpha$  and extracted with EasyPure HiPure Plasmid MaxiPrep Kit (TransGen). The linearized plasmid  
375 used for hydrogen peroxide treatment and library construction was cut by EcoRV (Takara) to generate  
376 blunt-ends. To prevent 8-OHdG formation during the procedure, we added 1% of 100 mM  
377 deferoxamine to the reaction buffer. For DNA purification, 1/10 volume of 5 M NaCl and 5x volume  
378 of 100% ethanol were added and samples were placed at -20°C for at least 30min. Samples were  
379 spun at 12,000 rpm at 4°C for 30 minutes. The supernatant was removed. Equivoluminal cold fresh  
380 75% ethanol was added and samples were again spun at 13,000 rpm for 10 minutes. The supernatant  
381 was discarded, and the pellet was allowed to dry before being resuspended in DNase-free water.

382

### 383 **Plasmid DNA oxidation by hydrogen peroxide treatment**

384 Fenton's reaction was used to induce oxidative damage (Wang et al., 2015). Final concentrations of  
385 10  $\mu\text{M}$   $\text{H}_2\text{O}_2$  and 2.5  $\mu\text{M}$   $\text{Fe}^{2+}$  were mixed with 70  $\mu\text{g}/\text{ml}$  of linearized pcDNA3.1-HA plasmid diluted  
386 in nuclease-free water. The Fenton's reaction was incubated for 1 hour at 37°C. The reaction can be  
387 blocked by placing the samples on ice or purifying the DNA immediately, and the purification method  
388 was as described above.

389

### 390 **Base excision reaction by Ogg1 treatment**

391 The standard assay of mOgg1 reaction was prepared as described (Zharkov et al., 2000) with slight  
392 modification. Briefly, reaction mixtures included 10ug of DNA, 25 mM sodium phosphate, pH 7.5,  
393 100 mM NaCl, 2 mM Na-EDTA, and 10 ug mOgg1 in a total volume of 1 ml. Reactions were initiated  
394 by adding enzyme and allowed to proceed for 30 min at 37°C.

395

### 396 **Plasmid DNA point mutation**

397 A point mutation was constructed with the Fast mutagenesis system kit (TransGen) and performed as  
398 the manufacturer's described by designing divergent primers.

399 MUT-random-forward: 5' -CAGTTGGGTGCACGACTGGGTTACATCGAAC-3';

400 MUT-random-reverse: 5'-GTCGTGCACCC AACTGATCTTCAGCATCTTTTAC-3';

401 MUT-2427-forward: 5'-CATGTA ACTCGCCTTCATCGTT GGGAACCGG-3';

402 MUT-2427-reverse: 5'-GAAGGCGAGTTACATGATCCCCCATGTTGTG-3'.

403

### 404 **Worms culture and synchronization**

405 The worms were cultured as others described with slightly modifications (Stiernagle, 2006). *E. coli*  
406 OP50 bacteria were cultured in Luria broth (LB) overnight at 37°C on 180rpm. The overnight cultured  
407 OP50 (100  $\mu\text{l}$ ) was seeded on nematode growth media (NGM, Luria broth, Agarose powder) plates  
408 and incubated overnight at 37°C for another 6 hours. The prepared NGM plates were used for wild-  
409 type strain N2 maintaining at 20°C. For *C. elegans* synchronization, worms were washed with sterile  
410  $\text{H}_2\text{O}$  and collected in a centrifuge tube, A total of 3.5 ml of sterile  $\text{H}_2\text{O}$ , and then 1.5 ml of NaOH and  
411 bleach mix (0.5 ml 5 N NaOH, 1 ml bleach) was added to the tube. The tube was vortexed for 20  
412 seconds every 2 minutes for a total of 10 minutes and then centrifuged for 30 seconds at 1300g to  
413 pellet released eggs. The eggs were resuspended with  $\text{H}_2\text{O}$  and transferred in a new prepared NGM  
414 plate.

415

### 416 ***C. elegans* sample preparation**

417 The hatched larvae were transferred to a newly prepared NGM plate and harvested the 1-day adult  
418 worms for gDNA extraction. To prevent the progeny from hatching, 5-fluoro-2'-deoxyuridine (Fudr)  
419 was added to the plates at a final concentration of 50  $\mu$ M (Heehwa G. Son, 2017). 1-day adult worms  
420 were placed on Fudr plates, and then transferred to Fudr plates every 3-4 days. After 10- and 20-days,  
421 worms were collected for gDNA extraction (Fig. S4), respectively. We collected a total of 30 plates  
422 for 1-day old, 30 plates for 10-day old and 60 plates for 20-day-old groups. We further subdivided  
423 the collected worms into two tubes for DNA extraction and RNA extraction, respectively in order to  
424 maintain the biology and batch consistency of *C. elegans* between DNA and RNA sequencing  
425 samples.

426

### 427 **Worm gDNA extraction**

428 We extracted total DNA of the *C.elegans* with the FastPure Cell/Tissue DNA Isolation Mini Kit  
429 (Vazyme) according to the manufacturer's instructions. To prevent 8-OHdG formation during the  
430 procedure, we added 1% of 100 mM deferoxamine to the reaction buffer. The concentration and  
431 quality of the resulting DNA were checked using the Nanodrop and Qubit dsDNA high sensitivity  
432 assay kit (Invitrogen).

433

### 434 **Library preparation and SMRT sequencing**

435 The genome sequencing was performed using Pacbio SMRT sequencing protocol as described  
436 (Xincong Kang, 2017) with modifications. First, the integrity, quality, and concentration of total DNA  
437 were analyzed by agarose gel electrophoresis, NanoDrop spectrophotometer (Thermo Fisher  
438 Scientific), and Qubit 3.0 fluorometer (Thermo Fisher Scientific). To prevent 8-OHdG formation  
439 during the library construction, we added 1% of 100 mM deferoxamine to the extracted DNA. DNA  
440 was haphazardly sheared to fragments with an average size of 5 kb (for plasmid gDNA) and 20 kb  
441 (for *C. elegans* gDNA) by using g-TUBE. Sheared DNA was then DNA end repaired. SMRTbell  
442 templates were obtained by ligating the blunt hairpin adapters to the ends of the repaired fragments,  
443 omitting repair DNA Damage step to avoid the potential loss of oxidative modification mediated by  
444 DNA repair mix, followed by the addition of exonuclease to remove failed ligation products. After  
445 annealing the sequencing primer and binding polymerase to SMRTbell templates, a total of 5 (1 each  
446 for 0  $\mu$ M, 10 $\mu$ M, and 10 $\mu$ M+Ogg1 treated and two point-mutated samples) SMRT cells were

447 sequenced on a PacBio SMRT sequencing platform. For *C. elegans* DNA, it was mechanically  
448 sheared by a Covaris g-TUBE device at 4,800 rpm for 2 minutes. SMRTbell templates were bound  
449 to v3 primers and polymerases using Sequel™ Binding Kit 2.1. Polymerase bound complexes were  
450 purified with SMRTbell Clean Up Column Kit and sequenced by diffusion loading method. We  
451 sequenced the plasmid (using 8 SMRT cells) and *C. elegans* gDNA libraries (using 13 SMRT cells:  
452 2 for D1; 8 for D10; 3 for D20) in a PacBio Sequel platform (Instrument ID: 54188) with a movie  
453 length of 600 minutes at the Center for Molecular Genetics, Institute for Translational Medicine,  
454 Qingdao University (Qingdao, China).

455

### 456 **RNA-Seq**

457 RNA-seq was performed as described (Wang et al., 2009) with slight modifications. Briefly, 1-day-  
458 old (n=30 plates), 10-day-old (n=30 plates) and 20-day-old (n=60 plates) wild-type *C. elegans* were  
459 harvested for total RNA extraction (Fig. S4) using the Trizol reagent (Invitrogen). The amount and  
460 quality of RNA were tested by Qubit RNA Assay Kit (Life Technologies), gel electrophoresis and  
461 Agilent Bioanalyzer 2100 system. NEBNext Ultra Directional RNA Library Prep Kit for Illumina  
462 (NEB) was used to construct the library according to the manufacturer's instructions, the sequencing  
463 libraries were prepared. Poly-A-containing mRNA was isolated from the total RNA by poly-T oligo-  
464 attached magnetic beads, and then fragmented by RNA fragmentation kit. The cDNA was  
465 synthesized using random primers through reverse transcription. After the ligation with adaptor, the  
466 cDNA was amplified by 15 cycles of PCR, and then 200-bp fragments were isolated using gel  
467 electrophoresis. We prepared 2 libraries for each age group, and each library was sequenced in 2  
468 separate lanes by an Illumina NovaSeq instrument in Shanghai Majorbio Biopharm Technology Co.  
469 Ltd. (Shanghai, China).

470

### 471 **HPLC and HPLC-MS/MS**

472 8-oxo-7,8-dihydroguanosine (8-OHdG) was analyzed by HPLC and HPLC-MS/MS as previously  
473 described (Allan Weimann, 2002; Henriksen et al., 2009; Wang et al., 2015) with modifications. In  
474 brief, 10µg gDNAs were completely dissolved in 8.5 µl of 300 µM deferoxamine mesylate (DFOM).  
475 Addition of 3.2 µl Nuclease P1 (stock of 1.25 U/µl in 300 mM sodium acetate, 0.2 mM ZnCl<sub>2</sub>, pH  
476 5.3, frozen at -20°C) was followed by 13.7µl alkaline phosphatase (0.365U/µl), and hydrolysis took  
477 place at 50°C for 60 min. After centrifugation for 10 s (2000g), the hydrolysate (100 µl) was  
478 transferred to a Micropure-EZ filter (Millipore) and centrifuged at 14,000g for 60 s for enzyme

479 removal. The hydrolysate was placed into an autosampler vial for HPLC-MS/MS analysis using  
480 Agilent Technologies 1290 Infinity II. The samples were separated on a C18 reverse phase column  
481 (Agilent Poroshell 120 EC-C18 27 $\mu$ m). The mobile phase composition was ammonium acetate (20  
482 mmol/L, pH 6.5)-methanol (90:10) at a flow-rate of 0.4 ml/min. The 8-OHdG standard was from  
483 Sigma-Aldrich. Mass spectrometric detection was performed on LC-ESI-MS system (Agilent  
484 Technologies 6460 Triple Quad LC/MS) equipped with an ESI ion source operated in the positive  
485 mode. The MS setting parameters were: Gas Temp 350°C, Gas Flow 10 l/min, Nebulizer 35psi,  
486 Capillary Positive 4000V, Capillary Negative 3500V, Frag=175V. The instruments were controlled  
487 by the Agilent MassHunter Workstation Software. The MS showed a Counts vs. Mass-to-Charge m/z  
488 for 8-OHdG.

489

### 490 **8-OHdG-IP-qPCR**

491 The worm DNA sample was sonicated to produce ~250bp fragments. The worms' DNA was  
492 incubated with specific anti-8-Hydroxy-2'-deoxyguanosine antibody (Abcam) in  
493 immunoprecipitation buffer (2.7 mM KCl, 2 mM potassium phosphate, 137 mM NaCl, 10 mM  
494 sodium phosphate, 0.05% Triton X-100, pH 7.4) for 2h at 4°C. The mixture was then  
495 immunoprecipitated by Protein A/G Plus-Agarose (Santa Cruz) that was pre-bound with bovine  
496 serum albumin (BSA) at 4°C for 2h. After extensive washing, the bound DNA was eluted from the  
497 beads in elution buffer (50 mM Tris, pH 8.0, 1% SDS, 10 mM EDTA) at 65°C, treated with proteinase  
498 K and purified using QIAquick PCR Purification Kit (Qiagen). Fold-enrichment of each fragment  
499 was determined by quantitative real-time PCR. The primers were listed in Supplementary Table S8.

500

### 501 **Dot blot analysis**

502 Dot blot assay was performed as others described with modifications (Greer et al., 2015b). 2500ng  
503 DNA samples were loaded per dot on nylon membranes,  $\lambda$ DNA was loaded as negative control.  
504 Membranes were allowed to air dry and then DNA was autocrosslinked in a UV stratalinker (80J) for  
505 2 times. The membrane was then blocked for 2 hours in 3% BSA at room temperature. Membranes  
506 were probed for 1 hour at room temperature and overnight at 4°C with primary antibody (Anti-8-  
507 Hydroxy-2'-deoxyguanosine antibody, 1:1000, Abcam) in 3% BSA. Blots were washed 3 times for  
508 15 minutes with TBST then probed with secondary antibody (Goat anti mouse IgG(H+L) HRP,  
509 1:1000, TransGen) in 3% BSA for 1 hour at room temperature. Blots were washed 3 times for 15  
510 minutes with TBST and ECL was applied and film was developed.



511

## 512 **Quantification and statistical analysis**

### 513 **1. Mapping and characterizing 8-OHdG modifications**

514 **(1) Genome references:** SMRT-seq data were mapped to the appropriate genomes using BLASR via  
515 SMRTportal. The *C. elegans* data were mapped to *C. elegans* genome version *WBcel235*  
516 ([ftp://ftp.ensemblgenomes.org/pub/metazoa/release-44/fasta/caenorhabditis\\_elegans](ftp://ftp.ensemblgenomes.org/pub/metazoa/release-44/fasta/caenorhabditis_elegans)).

517 **(2) Pre-processing of SMRT sequencing data for IPD analysis.** We followed the pre-processing  
518 steps as implemented in SMRTportal (Greer et al., 2015a). In brief, an initial filtering step removes  
519 all subreads with ambiguous alignments (MapQV<240), low accuracy (<75%) or short-aligned length  
520 (<50 bases). Next, an additional filtering step removes the subread IPD values from the mismatched  
521 positions with respect to the reference sequence. To prevent any potential slowing of polymerase  
522 kinetics over the course of an entire read, subread IPD normalization is done by dividing subread IPD  
523 values by their mean.

524 **(3) Identification of 8-OHdG modification.** Each of the raw data in h5 format were first aligned to  
525 reference genome using pbalgn in base modification identification mode. Then the post-aligned  
526 datasets were merged and sorted by using pbmerge and cmp5tool. The depth of sequencing dataset  
527 of all samples is above 100x coverage (Table S1), higher than the recommended coverage for  
528 detecting 8-OHdG modification in SMRT portal. Finally, the 8-OHdG was identified using  
529 ipdSummary.py script according to published protocol with slight modification (Clark et al., 2011;  
530 Flusberg et al., 2010). In brief, the single-molecule base modification analysis used to query the  
531 underlying heterogeneity of modifications across individual molecules is analogous to the standard  
532 base modification analysis supported in SMRT Analysis. The IPD ratio per given position is  
533 calculated by averaging the IPD values across all the subreads from multiple molecules before  
534 comparing with the in-silico control IPD. The statistically significant between IPD value at each  
535 position with the in-silico control is determined by the modification score ( $-\log_{10} p$ -value). Reads  
536 were filtered for having five or more subreads and required three or more IPDs with the preceding  
537 and following base correction for computation of the single-molecule IPD ratio. We then further  
538 filtered 8-OHdG sites with more than 25x coverage and <0.05 FDR as described above using  
539 customized scripts in Python. For motif identification, we then extracted 2 or 3bp from the upstream  
540 and downstream sequences and consensus sequence were analyzed for the identification of potential  
541 motif using customized Perl script. Motif analysis on consensus sequences next to 8-OHdG  
542 modification in *C. elegans* genome was performed using the Motif Elicitation by Expectation

543 Maximization (MEME) algorithm (Bailey et al., 2009). Circos plot, gene annotations, genomic  
544 distribution and genomic density of 8-OHdG sites were analyzed by customized scripts in R, Python  
545 and Perl with the assistance of Hyde Resource Biotechnology, Inc. Qingdao.

#### 546 **(4) Estimation of false discovery rate (FDR) for single nucleotide-level 8-OHdG calls.**

547 Considering each molecule separately, the IPD values (post-filtering) are grouped by their strand and  
548 mapped genomic position, and the mean value is calculated. At each genomic position of a single  
549 strand, the mean IPD values for each molecule follow the Gaussian distribution based on Central  
550 Limit Theory. The FDR corresponding to a specific threshold on a given statistical measure (e.g. IPD  
551 ratio, *t*-test *p*-value or identification *Q*<sub>v</sub>) is estimated by comparing the global distribution of the  
552 measure obtained from the native DNA sample with that from the G sites across the genome.  
553 Specifically, the FDR is calculated for each motif, FDRs can be estimated for single nucleotide-level  
554 8-OHdG calls only among the G sites corresponding to the motif across the genome. We generated  
555 the corresponding ROC curves by sliding a threshold value across the full range of observed IPDs.  
556 We computed the true positive rate for each threshold as the fraction of oxidized modification  
557 observations with an average IPD larger than the threshold. Similarly, we calculated the false positive  
558 rate by the fraction of non-oxidized observations with an average IPD larger than the threshold.  
559 Genome-wide distribution of 8-OHdG was mapped by R software circlize package.

560 **(5) Genomic region annotations and calculation of 8-OHdG modification levels.** We classified  
561 the genomic regions into 5 classes including 5'UTR, promoters, exons, introns, 3'UTR and annotated  
562 them as previously published *C. elegans* (*WBcel235*) reference deposited in Ensemble Metazoa  
563 database ([ftp://ftp.ensemblgenomes.org/pub/metazoa/release-44/fasta/caenorhabditis\\_elegans/dna/](ftp://ftp.ensemblgenomes.org/pub/metazoa/release-44/fasta/caenorhabditis_elegans/dna/)).  
564 For each annotated genomic region, the 8-OHdG level was calculated as the average 8-OHdG sites  
565 per total G bases covered within the region.

#### 566 **2. Differentially oxidized regions (DORs)**

567 DORs were identified by comparing the number of 8-OHdG sites within the same genomic length  
568 and region between the two samples. The 8-OHdG modification sites in 100kbp windows are counted  
569 using in-house Perl scripts and we assigned these regions as DORs only if the 8-OHdG sites in one  
570 sample is greater than or less than another sample, with a significant *p*-value < 0.05 given by multiple  
571 Student's *t*-test and a Benjamini–Hochberg false discovery rate (FDR) < 0.05.

#### 572 **3. Differentially oxidized genes (DOGs)**

573 DOGs were identified by comparing the number of 8-OHdG sites observed in the same gene  
574 annotated between two samples. The 8-OHdG modification sites in the whole length of the encoded

575 gene was counted using customized Perl scripts and we assigned these genes as DOGs only if the 8-  
576 OHdG sites in the gene region of one sample was greater than or less than that of another sample,  
577 with a significant  $p$ -value  $< 0.05$  given by multiple Fisher exact test and a Benjamini–Hochberg false  
578 discovery rate (FDR)  $< 0.05$ ; we assigned these genes as age-specifically oxidized gene only if the 8-  
579 OHdG sites were exclusively present in the annotated gene region of one sample compared to that of  
580 another sample.

#### 581 **4. Gene Ontology (GO) and KEGG (Kyoto Encyclopedia of Genes and Genomes) Analysis**

582 GO analysis was performed using Goatools (<https://github.com/tanghaibao/GOatools>), the  $p$ -value  
583 was corrected by Bonferroni, Holm, Sidak methods (false discovery rate) with a significant  $p$ -value  
584 cutoff of 0.01 and a Benjamini–Hochberg false discovery rate (FDR)  $< 0.05$  (Gene Ontology, 2015).  
585 KEGG analysis was performed using KOBAS (<http://kobas.cbi.pku.edu.cn/home.do>) and cytoscape  
586 ClueGO package, with a significant  $p$ -value cutoff of 0.01 and a Benjamini–Hochberg false discovery  
587 rate (FDR)  $< 0.05$  (Gene Ontology, 2015; Kanehisa and Goto, 2000).

#### 588 **5. RNA-Seq transcriptomic analysis**

589 **(1) Read mapping.** The raw paired end reads were trimmed and quality controlled by SeqPrep  
590 (<https://github.com/jstjohn/SeqPrep>) and Sickle (<https://github.com/najoshi/sickle>) with default  
591 parameters. Sequences with primer concatemers, weak signal, and/or poly A/T tails were culled.  
592 Clean reads were aligned to the *C. elegans* ([ftp://ftp.ensemblgenomes.org/pub/metazoa/release-](ftp://ftp.ensemblgenomes.org/pub/metazoa/release-43/fasta/caenorhabditis_elegans/dna/)  
593 [43/fasta/caenorhabditis\\_elegans/dna/](ftp://ftp.ensemblgenomes.org/pub/metazoa/release-43/fasta/caenorhabditis_elegans/dna/)) reference using TopHat (<http://tophat.cbcb.umd.edu/>,  
594 version2.0.0) software (Ghosh and Chan, 2016; Trapnell et al., 2009). The mapping criteria of bowtie  
595 was as follows: sequencing reads should be uniquely matched to the genome allowing up to 2  
596 mismatches, without insertions or deletions. Then the region of gene was expanded following depths  
597 of sites and the operon was obtained. In addition, the whole genome was split into multiple 15kbp  
598 windows that share 5kbp. New transcribed regions were defined as more than 2 consecutive windows  
599 without overlapped region of gene, where at least 2 reads mapped per window in the same orientation.  
600 The mapped reads were assembled by Cufflinks v2.1.1. Cuffdiff was used to calculate FPKMs of  
601 coding genes (Trapnell et al., 2012).

602 **(2) Differential expression analysis and Functional enrichment.** To identify DEGs (differential  
603 expression genes) between two different samples, the expression level of each transcript was  
604 calculated according to the fragments per kilobase of exon per million mapped reads (FRKM) method.  
605 RSEM (<http://deweylab.biostat.wisc.edu/rsem/>) was used to quantify gene abundances. R statistical  
606 package software EdgeR (Empirical analysis of Digital Gene Expression in R,

607 <http://www.bioconductor.org/packages/2.12/bioc/html/edgeR.html>) was utilized for differential  
608 expression analysis. In addition, functional-enrichment analysis including GO and KEGG were  
609 performed to identify which DEGs were significantly enriched in GO terms and metabolic pathways  
610 at Bonferroni-corrected  $p$ -value  $\leq 0.05$  compared with the whole-transcriptome background. GO  
611 functional enrichment and KEGG pathway analysis were carried out by Goatools  
612 (<https://github.com/tanghaibao/Goatools>) and KOBAS (<http://kobas.cbi.pku.edu.cn/home.do>).

### 613 **6. The integrated analysis of 8-OHdG modification in different genomic regions, gene** 614 **expression and aging.**

615 We calculated the 8-OHdG sites in 5 different genomic regions as described above. The log<sub>2</sub> of the  
616 gene expression levels (RPKM) of RefSeq genes were calculated as described (Trapnell et al., 2012).  
617 We plotted the Pearson correlation coefficients ( $r$ ) between 8-OHdG levels of each genomic  
618 region/gene expression and different age group using R Bioconductor software packages  
619 (<https://bioconductor.org/packages/3.9/bioc/>).

### 620 **7. Statistical Analysis**

621 Data were analyzed by two-way ANOVA using Bonferroni posttest (Prism 5.0). All of the data are  
622 presented as the mean  $\pm$  SEM and represent a minimum of three independent experiments.

### 624 **Acknowledgments**

625 We thank to Hyde Resource Biotechnology, Inc. (Qingdao) for helpful advice on genomic sequencing  
626 and data analysis. DNA sequencing was performed at Qingdao University, Institute for Translational  
627 Medicine, Center for Molecular Genetics and data analysis was completed at Qingdao University,  
628 Institute for Translational Medicine, Center for Bioinformatics. This project was supported by the  
629 Major Research Program of the National Natural Science Foundation of China (Grant number  
630 91849209), National Natural Science Foundation of China Research Fund for International Young  
631 Scientists (Grant number 81850410551), Natural Science Foundation of Shandong Province (Grant  
632 number ZR2019BH 014).

### 634 **Author's contributions**

635 L.H.H.A., and P.L., conceived and designed the study. L.H.H.A., Z.-Q.L., Z.L., Z.Y., X.C., and J.G.,  
636 prepared the samples; L.H.H.A., P.S., and Z.Z. prepared the Ogg1 reaction assays; L.H.H.A.  
637 performed library construction and genomic sequencing. L.H.H.A., and P.L. analyzed the data; X.C.,

638 Z.-Q.L., and Z.L. helped to analyze the data. L.H.H.A. wrote the manuscript; L.H.H.A., P.L., and  
639 Y.W., edited and submitted the manuscript. All authors discussed and finalized the manuscript for  
640 submission.

641

#### 642 **Declarations of interest**

643 The authors declare no potential conflicts of interest.

644

#### 645 **References**

646 Allan Weimann, D.B.a.H.E.P. (2002). Quantification of 8-oxo-guanine and guanine as the nucleobase,  
647 nucleoside and deoxynucleoside forms in human urine by high-performance liquid chromatography–  
648 electrospray tandem mass spectrometry. *Nucleic Acids Res.* *30*.

649 Ardui, S., Ameer, A., Vermeesch, J.R., and Hestand, M.S. (2018). Single molecule real-time (SMRT)  
650 sequencing comes of age: applications and utilities for medical diagnostics. *Nucleic Acids Res.* *46*,  
651 2159-2168.

652 Ashburner, M., Ball, C.A., Blake, J.A., Botstein, D., Butler, H., Cherry, J.M., Davis, A.P., Dolinski,  
653 K., Dwight, S.S., Eppig, J.T., *et al.* (2000). Gene ontology: tool for the unification of biology. The  
654 Gene Ontology Consortium. *Nat. Genet.* *25*, 25-29.

655 Bailey, T.L., Boden, M., Buske, F.A., Frith, M., Grant, C.E., Clementi, L., Ren, J., Li, W.W., and  
656 Noble, W.S. (2009). MEME Suite: tools for motif discovery and searching. *Nucleic Acids Res.* *37*,  
657 W202-W208.

658 Bazopoulou, D., Knoefler, D., Zheng, Y., Ulrich, K., Oleson, B.J., Xie, L., Kim, M., Kaufmann, A.,  
659 Lee, Y.-T., Dou, Y., *et al.* (2019). Developmental ROS individualizes organismal stress resistance  
660 and lifespan. *Nature* *576*, 301-305.

661 Bergamini, E., Bizzarri, R., Cavallini, G., Cerbai, B., Chiellini, E., Donati, A., Gori, Z., Manfrini, A.,  
662 Parentini, I., Signori, F., *et al.* (2004). Ageing and oxidative stress: a role for dolichol in the  
663 antioxidant machinery of cell membranes? *J. Alzheimers Dis.* *6*, 129-135.

664 Bickhart, D.M., Rosen, B.D., Koren, S., Sayre, B.L., Hastie, A.R., Chan, S., Lee, J., Lam, E.T.,  
665 Liachko, I., Sullivan, S.T., *et al.* (2017). Single-molecule sequencing and chromatin conformation  
666 capture enable de novo reference assembly of the domestic goat genome. *Nat. Genet.* *49*, 643-650.

667 Bryan, D.S., Ransom, M., Adane, B., York, K., and Hesselberth, J.R. (2014). High resolution  
668 mapping of modified DNA nucleobases using excision repair enzymes. *Genome Res.* *24*, 1534-1542.

669 Cadet, J., and Davies, K.J.A. (2017). Oxidative DNA damage & repair: An introduction. *Free Radic.*

670 Biol. Med. *107*, 2-12.

671 Chen, J.H., Hales, C.N., and Ozanne, S.E. (2007). DNA damage, cellular senescence and organismal  
672 ageing: causal or correlative? *Nucleic Acids Res.* *35*, 7417-7428.

673 Clark, T.A., Spittle, K.E., Turner, S.W., and Korlach, J. (2011). Direct detection and sequencing of  
674 damaged DNA bases. *Genome Integr.* *2*, 10.

675 Cogoi, S., Ferino, A., Miglietta, G., Pedersen, E.B., and Xodo, L.E. (2018). The regulatory G4 motif  
676 of the Kirsten ras (KRAS) gene is sensitive to guanine oxidation: implications on transcription.  
677 *Nucleic Acids Res.* *46*, 661-676.

678 Collado, M., Blasco, M.A., and Serrano, M. Cellular Senescence in Cancer and Aging. *Cell* *130*, 223-  
679 233.

680 Cooke, M.S., and Evans, M.D. (2007). 8-Oxo-deoxyguanosine: reduce, reuse, recycle? *Proc. Natl.*  
681 *Acad. Sci. U.S.A* *104*, 13535-13536.

682 Cooke, M.S., Evans, M.D., Dizdaroglu, M., and Lunec, J. (2003). Oxidative DNA damage:  
683 mechanisms, mutation, and disease. *FASEB J.* *17*, 1195-1214.

684 De Bont, R., and van Larebeke, N. (2004). Endogenous DNA damage in humans: a review of  
685 quantitative data. *Mutagenesis* *19*, 169-185.

686 de Magalhaes, J.P., Curado, J., and Church, G.M. (2009). Meta-analysis of age-related gene  
687 expression profiles identifies common signatures of aging. *Bioinformatics* *25*, 875-881.

688 Ding, Y., Fleming, A.M., and Burrows, C.J. (2017). Sequencing the Mouse Genome for the  
689 Oxidatively Modified Base 8-Oxo-7,8-dihydroguanine by OG-Seq. *J. Am. Chem. Soc.* *139*, 2569-  
690 2572.

691 Fallin, M.D., and Matteini, A. (2009). Genetic Epidemiology in Aging Research. *J. Gerontol. A Biol.*  
692 *Sci. Med. Sci.* *64A*, 47-60.

693 Fleming, A.M., Ding, Y., and Burrows, C.J. (2017). Oxidative DNA damage is epigenetic by  
694 regulating gene transcription via base excision repair. *Proc. Natl. Acad. Sci. U.S.A* *114*, 2604-2609.

695 Flusberg, B.A., Webster, D., Lee, J., Travers, K., Olivares, E., Clark, T.A., Korlach, J., and Turner,  
696 S.W. (2010). Direct detection of DNA methylation during single-molecule, real-time sequencing. *Nat.*  
697 *Methods* *7*, 461-465.

698 Gene Ontology, C. (2015). Gene Ontology Consortium: going forward. *Nucleic Acids Res.* *43*,  
699 D1049-D1056.

700 Ghosh, S., and Chan, C.K. (2016). Analysis of RNA-Seq Data Using TopHat and Cufflinks. *Methods*  
701 *Mol. Biol.* *1374*, 339-361.

- 702 Greer, Eric L., Blanco, Mario A., Gu, L., Sendinc, E., Liu, J., Aristizábal-Corrales, D., Hsu, C.-H.,  
703 Aravind, L., He, C., and Shi, Y. (2015a). DNA Methylation on N6-Adenine in *C. elegans*. *Cell* *161*,  
704 868-878.
- 705 Greer, Eric L., Blanco, Mario A., Gu, L., Sendinc, E., Liu, J., Aristizábal-Corrales, D., Hsu, C.-H.,  
706 Aravind, L., He, C., and Shi, Y. (2015b). DNA Methylation on N6-Adenine in *C. elegans*. *Cell* *161*,  
707 868-878.
- 708 Harries, L.W., Hernandez, D., Henley, W., Wood, A.R., Holly, A.C., Bradley-Smith, R.M.,  
709 Yaghootkar, H., Dutta, A., Murray, A., Frayling, T.M., *et al.* (2011). Human aging is characterized  
710 by focused changes in gene expression and deregulation of alternative splicing. *Aging Cell* *10*, 868-  
711 878.
- 712 He, K., Zhou, T., Shao, J., Ren, X., Zhao, Z., and Liu, D. (2014). Dynamic regulation of genetic  
713 pathways and targets during aging in *Caenorhabditis elegans*. *Aging (Albany NY)* *6*, 215-230.
- 714 Heehwa G. Son, M.S., Seokjin Ham, Wooseon Hwang, Dongyeop Lee, Seon Woo A. An, Murat  
715 Artan, Keunhee Seo, Rachel Kaletsky, Rachel N. Arey, Youngjae Ryu, Chang Man Ha, Yoon Ki Kim,  
716 Coleen T. Murphy, Tae-Young Roh, Hong Gil Nam, Seung-Jae V. Lee. (2017). RNA surveillance  
717 via nonsense-mediated mRNA decay is crucial for longevity in *daf-2/insulin/IGF-1* mutant *C. elegans*.  
718 *Nat. Commun.* *8*.
- 719 Hekimi, S., Burgess, J., Bussiere, F., Meng, Y., and Benard, C. (2001). Genetics of lifespan in *C.*  
720 *elegans*: molecular diversity, physiological complexity, mechanistic simplicity. *Trends Genet.* *17*,  
721 712-718.
- 722 Henriksen, T., Hillestrom, P.R., Poulsen, H.E., and Weimann, A. (2009). Automated method for the  
723 direct analysis of 8-oxo-guanosine and 8-oxo-2'-deoxyguanosine in human urine using  
724 ultraperformance liquid chromatography and tandem mass spectrometry. *Free Radic. Biol. Med.* *47*,  
725 629-635.
- 726 Hyun, S.-Y., and Jang, Y.-J. (2014). p53 activates G<sub>1</sub> checkpoint following DNA damage by  
727 doxorubicin during transient mitotic arrest. *Oncotarget* *6*, 4804-4815.
- 728 Kanehisa, M., and Goto, S. (2000). KEGG: kyoto encyclopedia of genes and genomes. *Nucleic Acids*  
729 *Res.* *28*, 27-30.
- 730 Kawahara, T.L., Michishita, E., Adler, A.S., Damian, M., Berber, E., Lin, M., McCord, R.A.,  
731 Ongaigui, K.C., Boxer, L.D., Chang, H.Y., *et al.* (2009). SIRT6 links histone H3 lysine 9  
732 deacetylation to NF-kappaB-dependent gene expression and organismal life span. *Cell* *136*, 62-74.
- 733 Lagadu, S., Pottier, I., Sichel, F., Laurent, C., Lefaix, J.L., and Prevost, V. (2010). Detection of

734 extracellular 8-oxo-7,8-dihydro-2'-deoxyguanosine as a biomarker of oxidative damage in X-  
735 irradiated fibroblast cultures: optimization of analytical procedure. *Biomarkers* 15, 707-714.

736 Lapiere, L.R., and Hansen, M. (2012). Lessons from *C. elegans*: signaling pathways for longevity.  
737 *Trends Endocrinol. Metabol. TEM* 23, 637-644.

738 Lenaz, G. (1998). Role of mitochondria in oxidative stress and ageing. *Biochim. Biophys. Acta.* 1366,  
739 53-67.

740 Lin, M.T., and Flint Beal, M. (2003). The oxidative damage theory of aging. *Clin. Neurosci. Res.* 2,  
741 305-315.

742 Liochev, S.I. (2013). Reactive oxygen species and the free radical theory of aging. *Free Radic. Biol.*  
743 *Med.* 60, 1-4.

744 Lopez-Otin, C., Blasco, M.A., Partridge, L., Serrano, M., and Kroemer, G. (2013). The hallmarks of  
745 aging. *Cell* 153, 1194-1217.

746 Ou, H.L., and Schumacher, B. (2018). DNA damage responses and p53 in the aging process. *Blood*  
747 131, 488-495.

748 Park, E.M., Shigenaga, M.K., Degan, P., Korn, T.S., Kitzler, J.W., Wehr, C.M., Kolachana, P., and  
749 Ames, B.N. (1992). Assay of excised oxidative DNA lesions: isolation of 8-oxoguanine and its  
750 nucleoside derivatives from biological fluids with a monoclonal antibody column. *Proc Natl Acad*  
751 *Sci U S A* 89, 3375-3379.

752 Pastukh, V., Roberts, J.T., Clark, D.W., Bardwell, G.C., Patel, M., Al-Mehdi, A.B., Borchert, G.M.,  
753 and Gillespie, M.N. (2015). An oxidative DNA "damage" and repair mechanism localized in the  
754 VEGF promoter is important for hypoxia-induced VEGF mRNA expression. *Am. J. Physiol. Lung*  
755 *Cell Mol. Physiol.* 309, L1367-1375.

756 Pérez, V.I., Bokov, A., Van Remmen, H., Mele, J., Ran, Q., Ikeno, Y., and Richardson, A. (2009). Is  
757 the oxidative stress theory of aging dead? *Biochim. Biophys. Acta.* 1790, 1005-1014.

758 Pilzecker, B., Buoninfante, O.A., and Jacobs, H. (2019). DNA damage tolerance in stem cells, ageing,  
759 mutagenesis, disease and cancer therapy. *Nucleic Acids Res.* 47, 7163-7181.

760 Poetsch, A.R., Boulton, S.J., and Luscombe, N.M. (2018). Genomic landscape of oxidative DNA  
761 damage and repair reveals regioselective protection from mutagenesis. *Genome Biol.* 19, 215.

762 Rando, Thomas A., and Chang, Howard Y. (2012). Aging, Rejuvenation, and Epigenetic  
763 Reprogramming: Resetting the Aging Clock. *Cell* 148, 46-57.

764 Rasko, D.A., Webster, D.R., Sahl, J.W., Bashir, A., Boisen, N., Scheutz, F., Paxinos, E.E., Sebra, R.,  
765 Chin, C.S., Iliopoulos, D., *et al.* (2011). Origins of the *E. coli* strain causing an outbreak of hemolytic-



766 uremic syndrome in Germany. *N. Engl. J. Med.* *365*, 709-717.

767 Salmon, A.B., Richardson, A., and Perez, V.I. (2010). Update on the oxidative stress theory of aging:  
768 does oxidative stress play a role in aging or healthy aging? *Free Radic. Biol. Med.* *48*, 642-655.

769 Sanchez-Flores, M., Marcos-Perez, D., Costa, S., Teixeira, J.P., Bonassi, S., Pasaro, E., Laffon, B.,  
770 and Valdiglesias, V. (2017). Oxidative stress, genomic features and DNA repair in frail elderly: A  
771 systematic review. *Ageing Res. Rev.* *37*, 1-15.

772 Schadt, E.E., Banerjee, O., Fang, G., Feng, Z., Wong, W.H., Zhang, X., Kislyuk, A., Clark, T.A.,  
773 Luong, K., Keren-Paz, A., *et al.* (2013). Modeling kinetic rate variation in third generation DNA  
774 sequencing data to detect putative modifications to DNA bases. *Genome Res.* *23*, 129-141.

775 Schibel, A.E., An, N., Jin, Q., Fleming, A.M., Burrows, C.J., and White, H.S. (2010). Nanopore  
776 detection of 8-oxo-7,8-dihydro-2'-deoxyguanosine in immobilized single-stranded DNA via adduct  
777 formation to the DNA damage site. *J. Am. Chem. Soc.* *132*, 17992-17995.

778 Speakman, J.R., Blount, J.D., Bronikowski, A.M., Buffenstein, R., Isaksson, C., Kirkwood, T.B.,  
779 Monaghan, P., Ozanne, S.E., Beaulieu, M., Briga, M., *et al.* (2015). Oxidative stress and life histories:  
780 unresolved issues and current needs. *Ecol. Evol.* *5*, 5745-5757.

781 Stiernagle, T. (2006). Maintenance of *C. elegans*. *WormBook*.

782 Tang, F., Liu, S., Li, Q.Y., Yuan, J., Li, L., Wang, Y., Yuan, B.F., and Feng, Y.Q. (2019). Location  
783 analysis of 8-oxo-7,8-dihydroguanine in DNA by polymerase-mediated differential coding. *Chem.*  
784 *Sci.* *10*, 4272-4281.

785 Thompson, H.J. (2004). DNA oxidation products, antioxidant status, and cancer prevention. *J. Nutr.*  
786 *134*, 3186s-3187s.

787 Tornaletti, S., Maeda, L.S., Kolodner, R.D., and Hanawalt, P.C. (2004). Effect of 8-oxoguanine on  
788 transcription elongation by T7 RNA polymerase and mammalian RNA polymerase II. *DNA Repair*  
789 (Amst) *3*, 483-494.

790 Trapnell, C., Pachter, L., and Salzberg, S.L. (2009). TopHat: discovering splice junctions with RNA-  
791 Seq. *Bioinformatics* *25*, 1105-1111.

792 Trapnell, C., Roberts, A., Goff, L., Pertea, G., Kim, D., Kelley, D.R., Pimentel, H., Salzberg, S.L.,  
793 Rinn, J.L., and Pachter, L. (2012). Differential gene and transcript expression analysis of RNA-seq  
794 experiments with TopHat and Cufflinks. *Nat. Protoc.* *7*, 562-578.

795 Uno, M., and Nishida, E. (2016). Lifespan-regulating genes in *C. elegans*. *NPJ Aging Mech. Dis.* *2*,  
796 16010.

797 Van Auken, K., Jaffery, J., Chan, J., Muller, H.M., and Sternberg, P.W. (2009). Semi-automated

798 curation of protein subcellular localization: a text mining-based approach to Gene Ontology (GO)  
799 Cellular Component curation. *BMC Bioinformatics* *10*, 228.

800 van der Kemp, P.A., Thomas, D., Barbey, R., de Oliveira, R., and Boiteux, S. (1996). Cloning and  
801 expression in *Escherichia coli* of the OGG1 gene of *Saccharomyces cerevisiae*, which codes for a  
802 DNA glycosylase that excises 7,8-dihydro-8-oxoguanine and 2,6-diamino-4-hydroxy-5-N-  
803 methylformamidopyrimidine. *Proc. Natl. Acad. Sci. U.S.A* *93*, 5197-5202.

804 Wallace, S.S. (2002). Biological consequences of free radical-damaged DNA bases. *Free Radic. Biol.*  
805 *Med.* *33*, 1-14.

806 Wang, J.X., Gao, J., Ding, S.L., Wang, K., Jiao, J.Q., Wang, Y., Sun, T., Zhou, L.Y., Long, B., Zhang,  
807 X.J., *et al.* (2015). Oxidative Modification of miR-184 Enables It to Target Bcl-xL and Bcl-w. *Mol.*  
808 *Cell* *59*, 50-61.

809 Wang, Z., Gerstein, M., and Snyder, M. (2009). RNA-Seq: a revolutionary tool for transcriptomics.  
810 *Nat. Rev. Genet* *10*, 57-63.

811 Weimann, A., Belling, D., and Poulsen, H.E. (2002). Quantification of 8-oxo-guanine and guanine as  
812 the nucleobase, nucleoside and deoxynucleoside forms in human urine by high-performance liquid  
813 chromatography-electrospray tandem mass spectrometry. *Nucleic Acids Res.* *30*, E7.

814 Wenger, A.M., Peluso, P., Rowell, W.J., Chang, P.-C., Hall, R.J., Concepcion, G.T., Ebler, J.,  
815 Functammasan, A., Kolesnikov, A., Olson, N.D., *et al.* (2019). Accurate circular consensus long-read  
816 sequencing improves variant detection and assembly of a human genome. *Nat. Biotechnol.* *37*, 1155-  
817 1162.

818 Wu, J., McKeague, M., and Sturla, S.J. (2018). Nucleotide-Resolution Genome-Wide Mapping of  
819 Oxidative DNA Damage by Click-Code-Seq. *J. Am. Chem. Soc.* *140*, 9783-9787.

820 Xincong Kang, L.H., Pengyuan Shen, Rui Li, Dongbo Liu. (2017). SMRT Sequencing Revealed  
821 Mitogenome Characteristics and Mitogenome-Wide DNA Modification Pattern in *Ophiocordyceps*  
822 *sinensis*. *Front. Microbiol.* *8*.

823 Yoshihara, M., Jiang, L., Akatsuka, S., Suyama, M., and Toyokuni, S. (2014). Genome-wide profiling  
824 of 8-oxoguanine reveals its association with spatial positioning in nucleus. *DNA Res.* *21*, 603-612.

825 Zawia, N.H., Lahiri, D.K., and Cardozo-Pelaez, F. (2009). Epigenetics, oxidative stress, and  
826 Alzheimer disease. *Free Radic. Biol. Med.* *46*, 1241-1249.

827 Zharkov, D.O., Rosenquist, T.A., Gerchman, S.E., and Grollman, A. (2000). Substrate Specificity  
828 and Reaction Mechanism of Murine 8-Oxoguanine-DNA Glycosylase, Vol 275.

829

## 830 **Figure legends**

831 **Figure 1. The repertoire of oxidative modifications in *C. elegans* genome displays age-specific**  
832 **patterns.** **A.** The workflow of identification of 8-OHdG in the whole-genome level using SMRT  
833 sequencing. **B.** The total number of modified and unmodified G-bases observed in different aged  
834 groups of *C. elegans*. **C.** Relative frequency of 8-OHdG among different age groups (8-OHdG/G %).  
835 **D.** Overlap of 8-OHdG modified sites in 1-day-, 10-day- and 20-day-old *C.elegans*. **E.** Circos plots  
836 of 8-OHdG modification profiles of different aged *C. elegans*. From inner to outer circles: 1<sup>st</sup> and 2<sup>nd</sup>  
837 indicate IPD ratios, 3<sup>rd</sup> and 4<sup>th</sup> represent the coverage of each position detected, 5<sup>th</sup> and 6<sup>th</sup> indicate  
838 the modification score ( $-\log_{10} p\text{-value}$ ) for each position tested, 7<sup>th</sup> and 8<sup>th</sup> denote 8-OHdG  
839 modification for the forward and reversed strands, 9<sup>th</sup> indicates chromosomes respectively, across 1-  
840 day-old, 10-day-old and 20-day-old *C. elegans*. **F.** Motif analysis based on consensus sequences next  
841 to 8-OHdG sites.

842

843 **Figure 2. The trends and characteristics of 8-OHdG modification show heterogeneity among**  
844 **different age groups.** **A.** The total number of 8-OHdG bases detected in different samples. **B.** The  
845 relative frequency of 8-OHdG/G across different chromosomes. To avoid the influence of number of  
846 G occupied in each chromosome on the rate of 8-OHdG, the 8-OHdG count was normalized by the  
847 total number of G in each chromosome. **C** shows the dynamics of 8-OHdG modifications across  
848 different chromosomes. **D.** Pie chart of the distribution of 8-OHdG sites in different genomic regions.  
849 We analyzed 8-OHdG distribution in genomic regions divided into promoters, 5'UTR, 3'UTR, exon  
850 and intron regions. **E and F.** 8-OHdG modifications detected in different genomic regions of each  
851 chromosome. **E** shows the relative frequency, and **F** shows the proportion of 8-OHdG modifications  
852 per each chromosome.

853

854 **Figure 3. Oxidative modification patterns change with ageing.** **A.** Overlap of genes with 8-OHdG  
855 modifications in *C.elegans* of different ages. **B.** The circos plots show the density of 8-OHdG  
856 modified genes. Gene density was quantified by the number of genes in every 100 kbp window. **C.**  
857 Distribution of age-specific 8-OHdG modified genes across different chromosomes. **D.** The dynamics  
858 of the chromosomal distribution of age-specific 8-OHdG modified genes among different age groups.  
859 Data shown are the % of 8-OHdG modified genes relative to a total number of genes. **E.** The  
860 functional enrichment of age-specific oxidized genes. Selected GO term enrichment for the genes

861 exclusively oxidized in 10-day- and 20-day-old *C. elegans*. \* $P < 0.05$ , \*\* $P < 0.01$ ; two-sided. **F.** The  
862 heatmap shows the genomic distribution of 8-OHdG sites in top-20 age-specific oxidized genes.

863

864 **Figure 4. The differentially 8-OHdG modified genes are annotated to longevity regulating**  
865 **pathways.** **A.** Heatmap of the 8-OHdG level of differentially oxidized regions (DORs) among  
866 different samples. The color key from blue to red indicates the relative 8-OHdG modification level in  
867  $k$ -value from low to high, respectively. **B.** Major Gene Ontology (GO) category annotations of genes  
868 associated with 8-OHdG modification. Gene ontology analysis of differentially oxidized genes  
869 (DOGs, fold change modification bases in each gene between D1 vs. D10). **C-E.** Distribution of DOG  
870 clusters in different age groups. **C** indicates differentially oxidized pathways between D10 vs. D1; **D**  
871 indicates the comparisons between D20 vs. D1; **E** indicates D20 vs. D10. Portions of pie charts  
872 represent the proportion of genes in the pathway that are oxidatively modified within each biological  
873 process, using a  $p$ -value cutoff of 0.01. The number indicates the number of 8-OHdG modified genes  
874 in each pathway. **F.** The figure represents the top-5 signaling pathways that annotated DOGs. The  
875 Color portion of pie chart in each signaling pathway represents the percentage of genes in the pathway  
876 that are associated with 8-OHdG modification.

877

878 **Figure 5. The oxidative DNA damage in promoter regions is negatively correlated with the**  
879 **expression of pro-longevity genes.** **A.** The pro-longevity gene set enriched by the differential 8-  
880 OHdG modification between 10-day- vs. 1-day-old, and 20-day- vs. 1-day-old worms and telomere  
881 maintenance gene sets enriched by the differential 8-OHdG modification between 20-day- vs. 1-day-  
882 old worms. **B.** Comparisons of 8-OHdG modification levels in key ageing regulatory genes among  
883 different samples. Green indicates pro-longevity; red indicates anti-longevity. The genes are ordered  
884 by 8-OHdG modification levels. **C.** Representative figure showing the distribution of 8-OHdG  
885 modifications in functional regions of key ageing regulatory-genes. **D.** The correlation analysis for 8-  
886 OHdG modification and transcript expression of pro-longevity genes. The color scheme indicates the  
887 *Pearson* correlation coefficient, indicating the strength of the correlation between two variables. **E.**  
888 Genome browser view of representative loci in *mev-1* and *sir-2.1* genes across different samples. 8-  
889 OHdG sites are indicated color bars. **F.** The transcript expression levels of *mev-1* and *sir-2.1*. The  
890 transcript level for each gene was estimated by averaging the fragments per kb exon model per million  
891 mapped reads (FPKM).

892

893 **Figure 1**

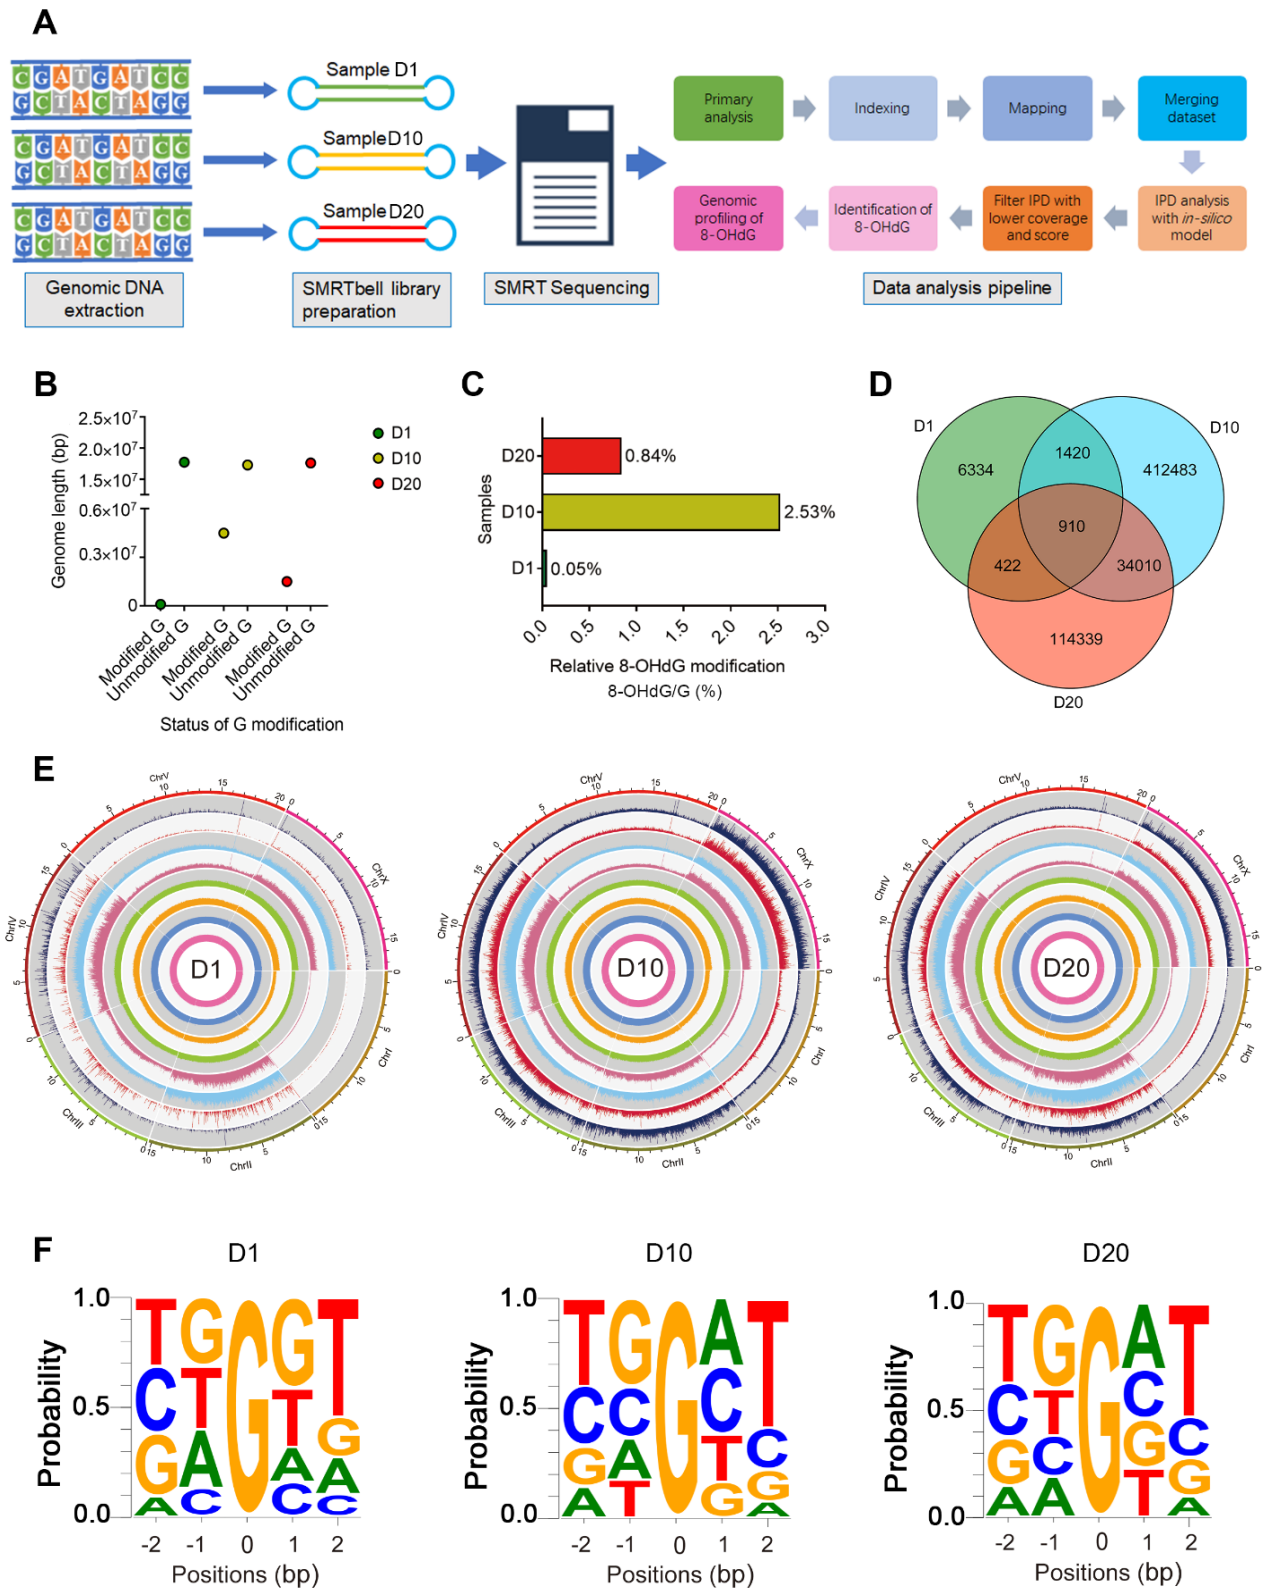

894

895

896 **Figure 2**

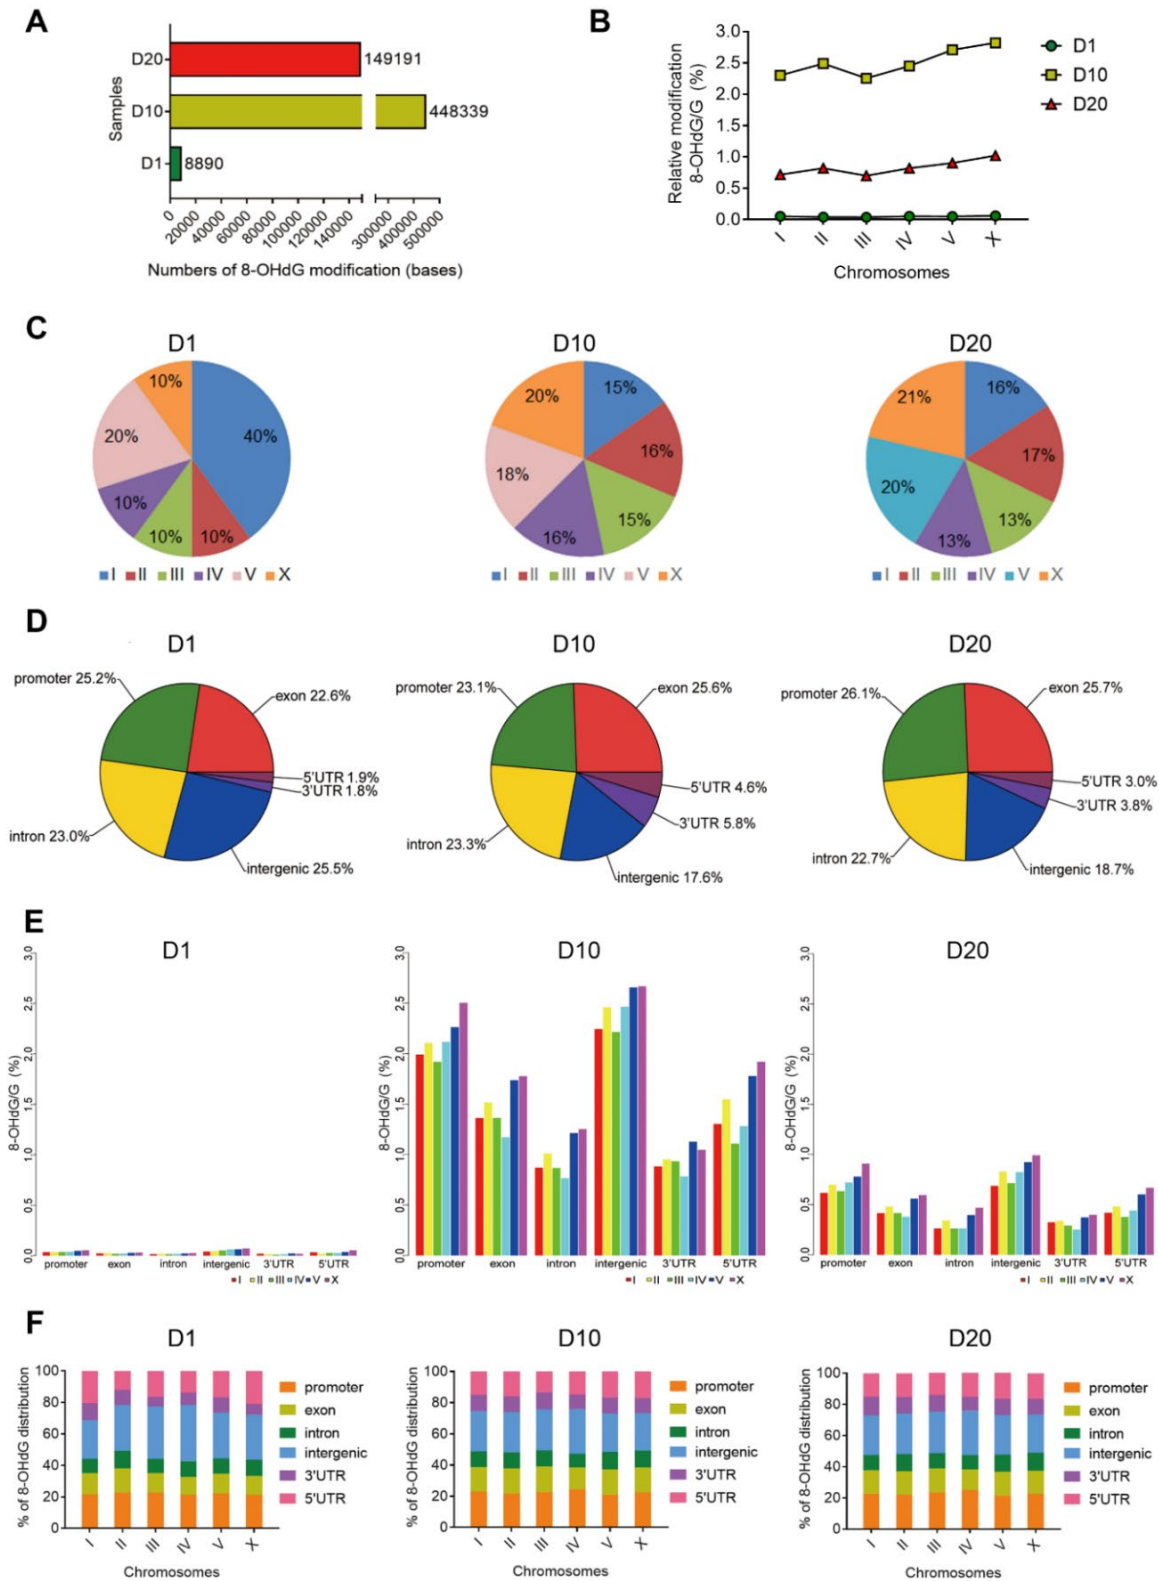

897

898

899 **Figure 3**

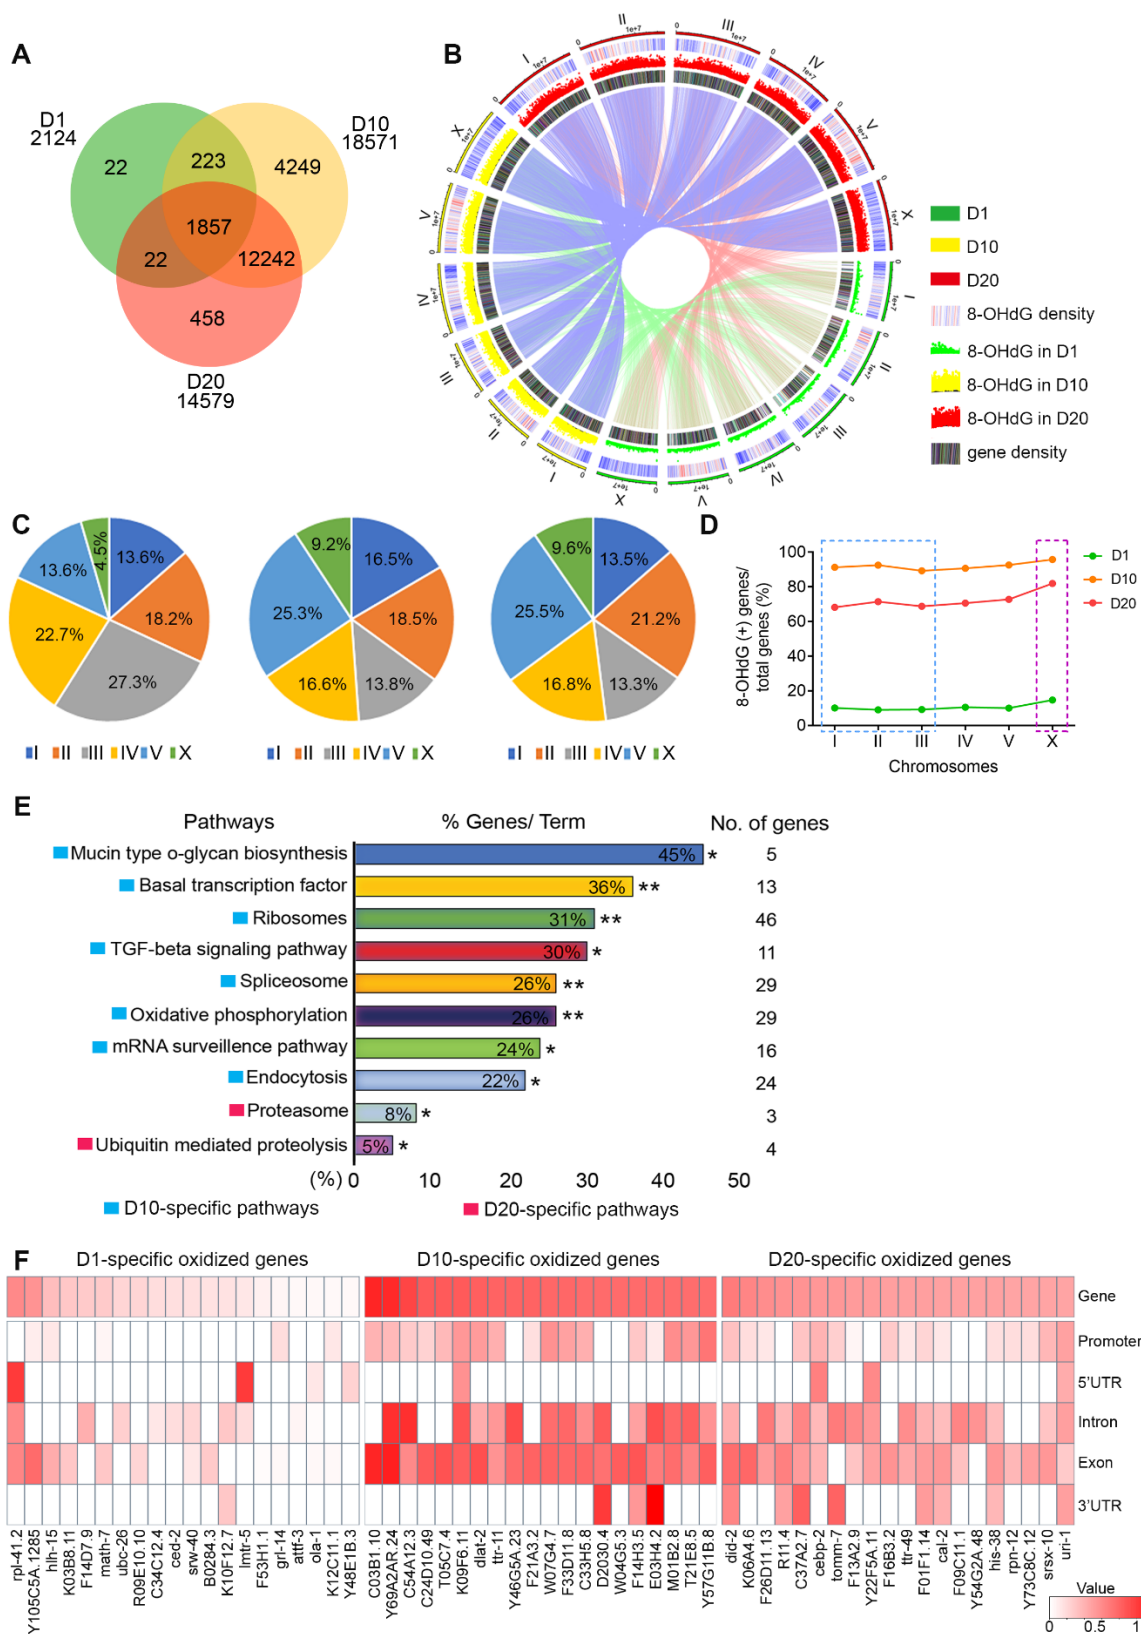

900

901

902 **Figure 4**

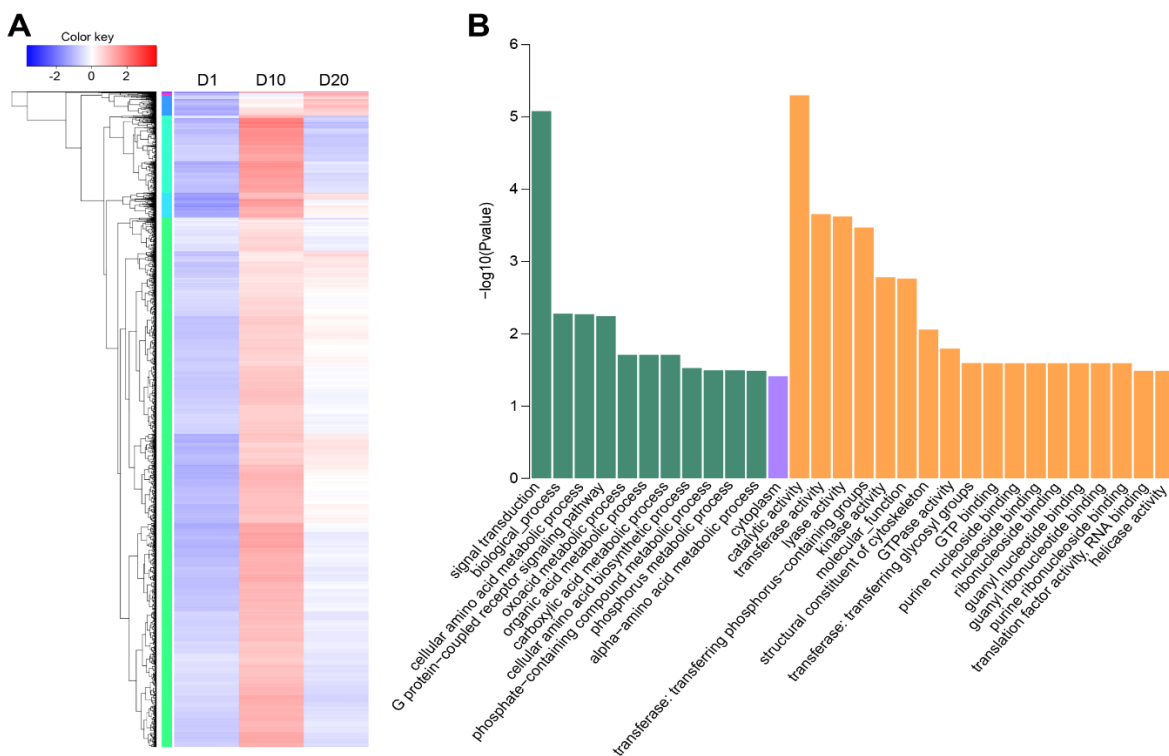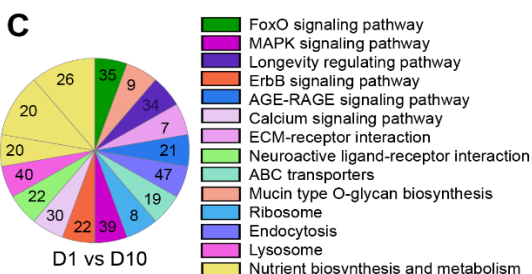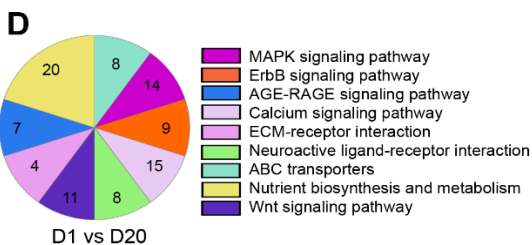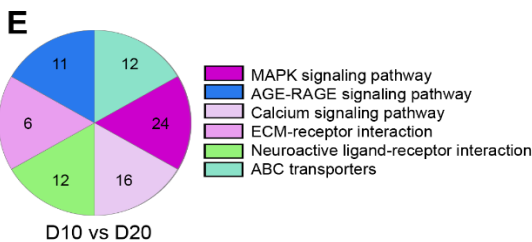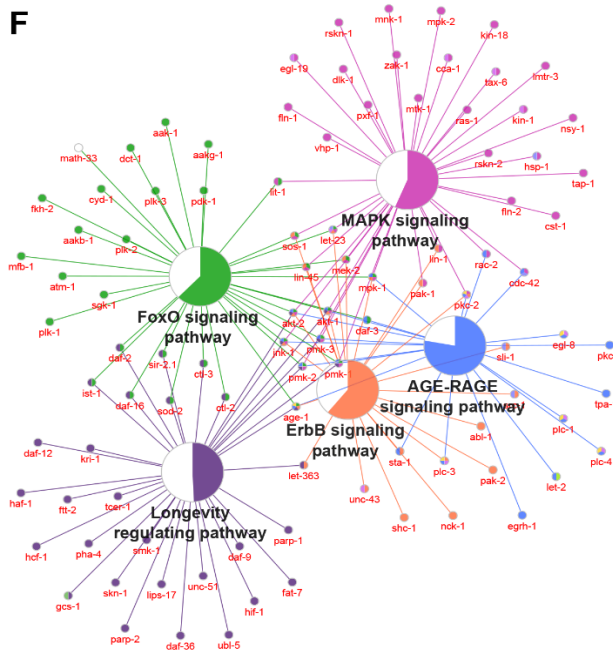

903

904



905 **Figure 5**

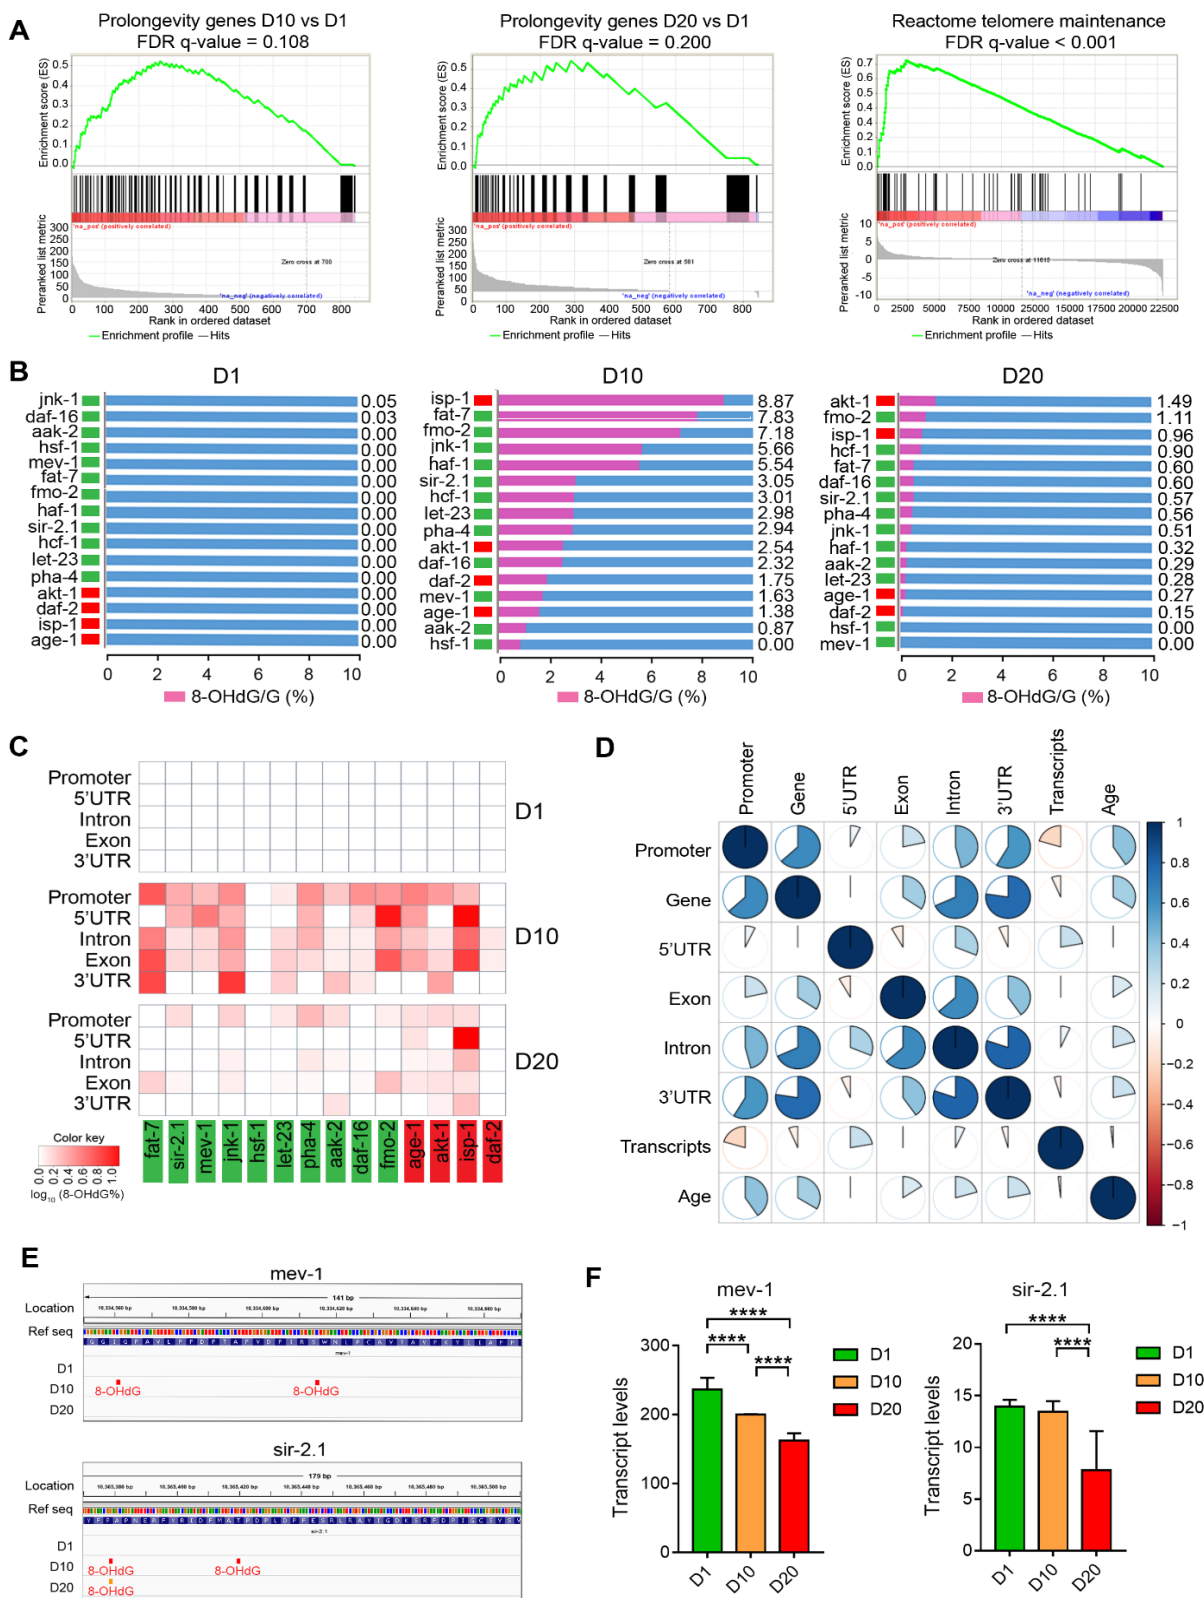

906

907

908 **Supplementary materials**

909 **Supplementary Figures**

910

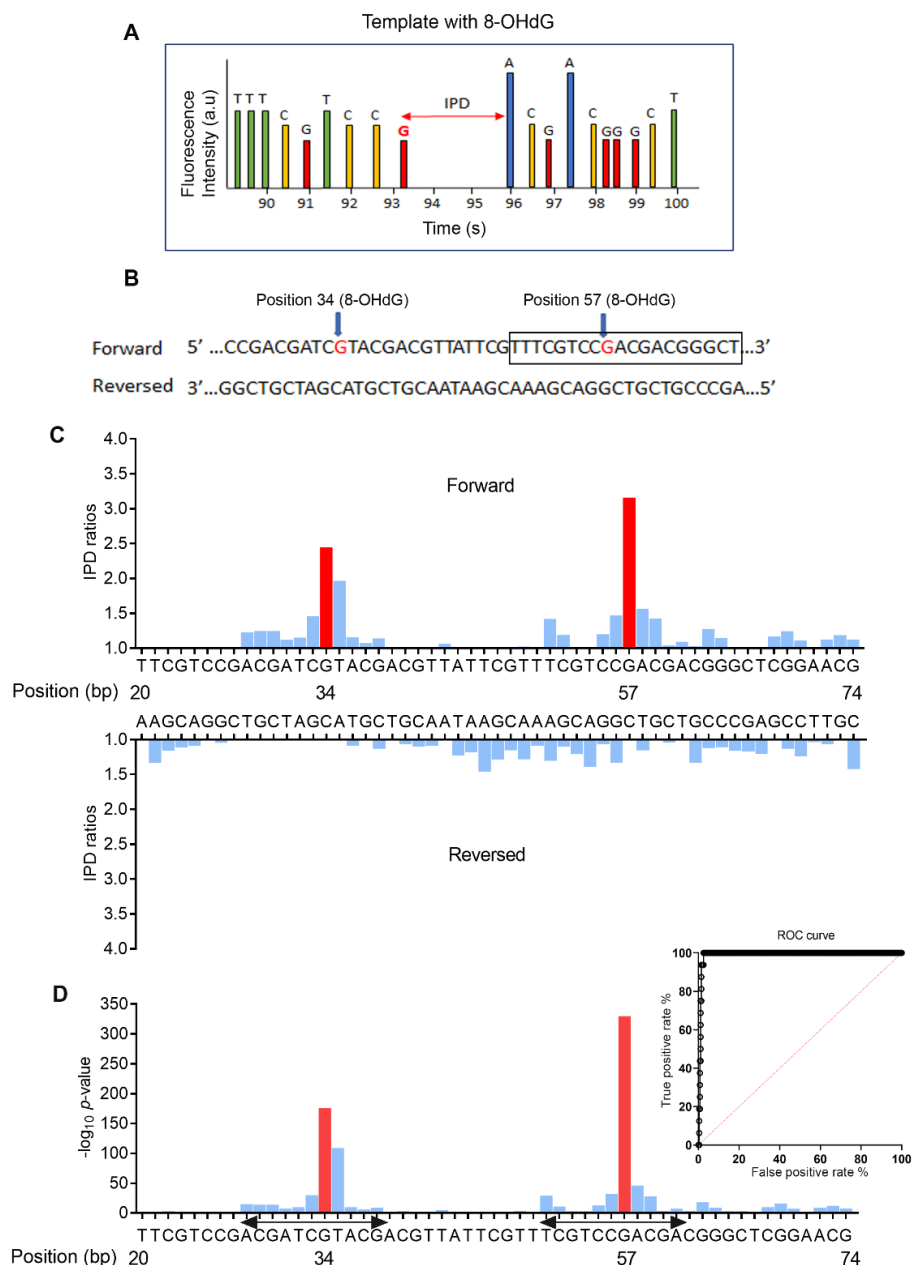

911 **Figure S1. 8-OHdG modification captured by SMRT sequencing.** **A.** Schematic illustration of IPD prolongation in the  
 912 presence of 8-OHdG modification. **B and C.** 8-OHdG modification captured by SMRT sequencing. To calibrate the  
 913 method, we used an oligonucleotide containing two 8-OHdGs and sequenced in SMRT *RSII* platform. **B** shows the  
 914 nucleotide sequence. **C and D** show the mean IPD ratio and modification score ( $-\log_{10} p\text{-value}$ ) at each position and  
 915 putative 8-OHdG event detected at 8-OHdG sites. The IPD ratio of each base position was determined by comparing the  
 916 ratio of the IPD at a site in the native sample to the IPD at a site in an in-silico control (Schadt et al., 2013) after measuring  
 917  $n=465$  times in average. After filtering the sequencing depth and modification score using customized python scripts,  
 918 putative 8-OHdG events were detected at the positions 34 and 57 of the synthetic oligonucleotide with slight IPD ratios  
 919 changes next to the modification site. Receiver operating characteristic (ROC) curves, based on the IPD distributions from  
 920 the positive oxidation signal parameterized by IPD threshold and medication score, for assigning oxidation status of  
 921 guanosine nucleotide.

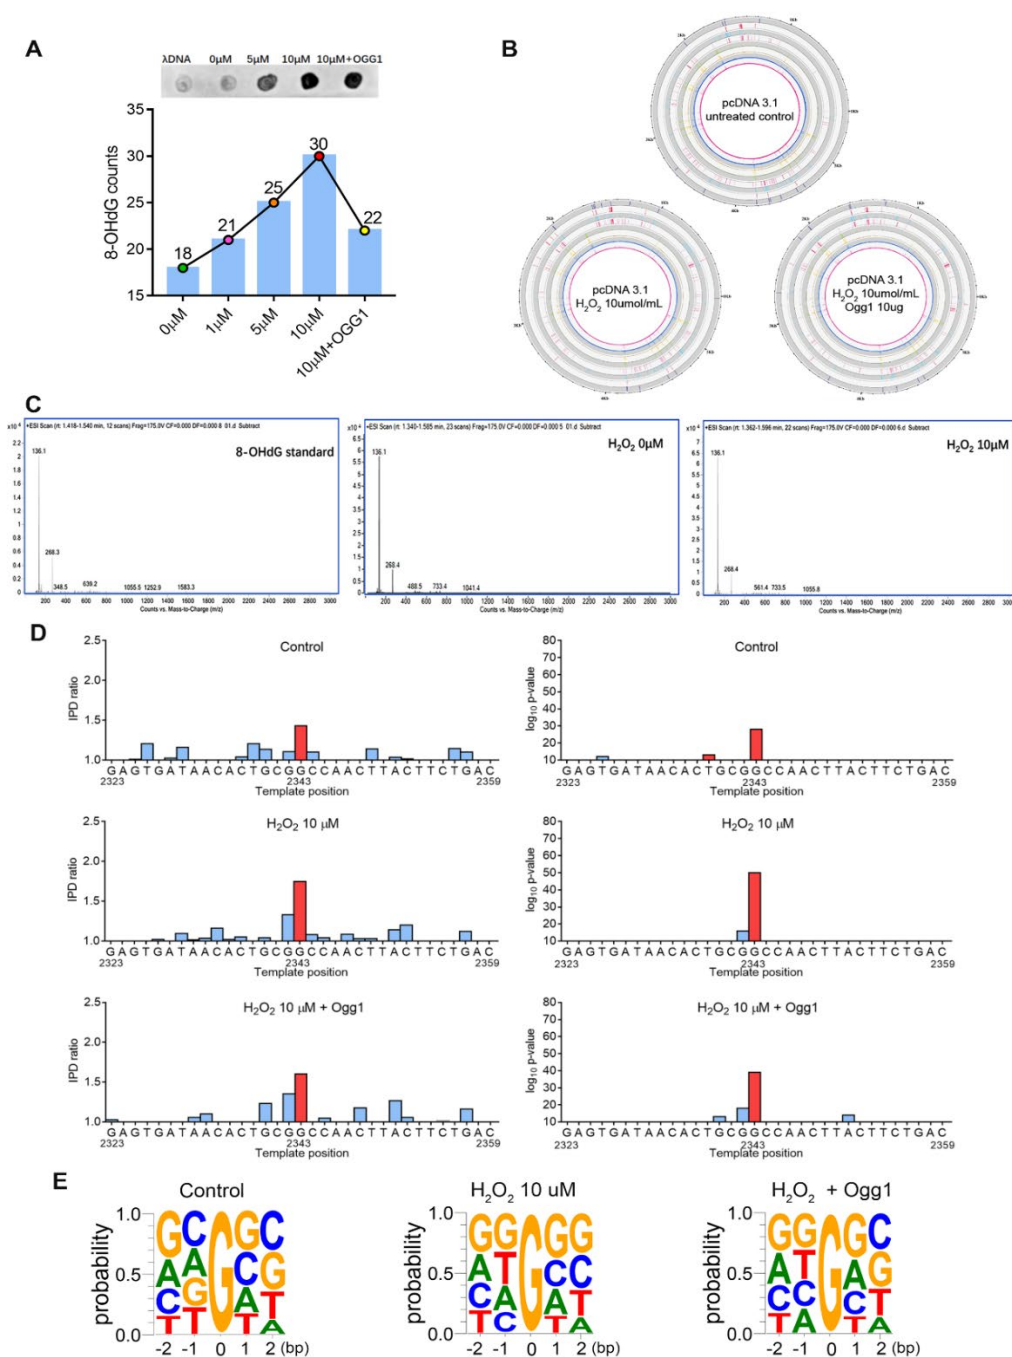

922

923

924

925

926

927

928

929

930

931

932

933

934

**Figure S2. SMRT technology is feasible to detect 8-OHdG modification at whole-genome level in plasmid genome.**

**A.** The dot-blot analysis and 8-OHdG counts identified in different plasmid samples by SMRT sequencing. The plasmid genomic DNAs were treated with indicated dose of H<sub>2</sub>O<sub>2</sub> and 10µg of Ogg1, and the presence of 8-OHdG was detected (n=2). **B.** Circos plots showing the distribution of 8-OHdG bases detected in different plasmid samples. From inner to outer circles: 1<sup>st</sup> and 2<sup>nd</sup> indicate IPD ratios, 3<sup>th</sup> and 4<sup>th</sup> represent the coverage of each position detected, 5<sup>rd</sup> and 6<sup>th</sup> indicate the modification score (-log<sub>10</sub> p-value) for each position tested, and 7<sup>th</sup> and 8<sup>th</sup> denote 8-OHdG modification for the forward and reversed strands, in untreated control, hydrogen peroxide (H<sub>2</sub>O<sub>2</sub>) treated and oxoguanine glycosylase (Ogg1) treated samples. **C.** The presence of 8-OHdG in each sample was confirmed by HPLC associated with tandem Mass Spectrometry (HPLC-MS/MS). **D** shows the mean IPD ratio and modification score (-log<sub>10</sub> p-value) at each position of one 8-OHdG event detected in plasmid genome. **E.** Motif analysis based on consensus sequences (-2bp and +2bp) next to 8-OHdG sites detected under different conditions: untreated control, hydrogen peroxide (H<sub>2</sub>O<sub>2</sub>) treated and oxoguanine glycosylase (Ogg1) treated samples.

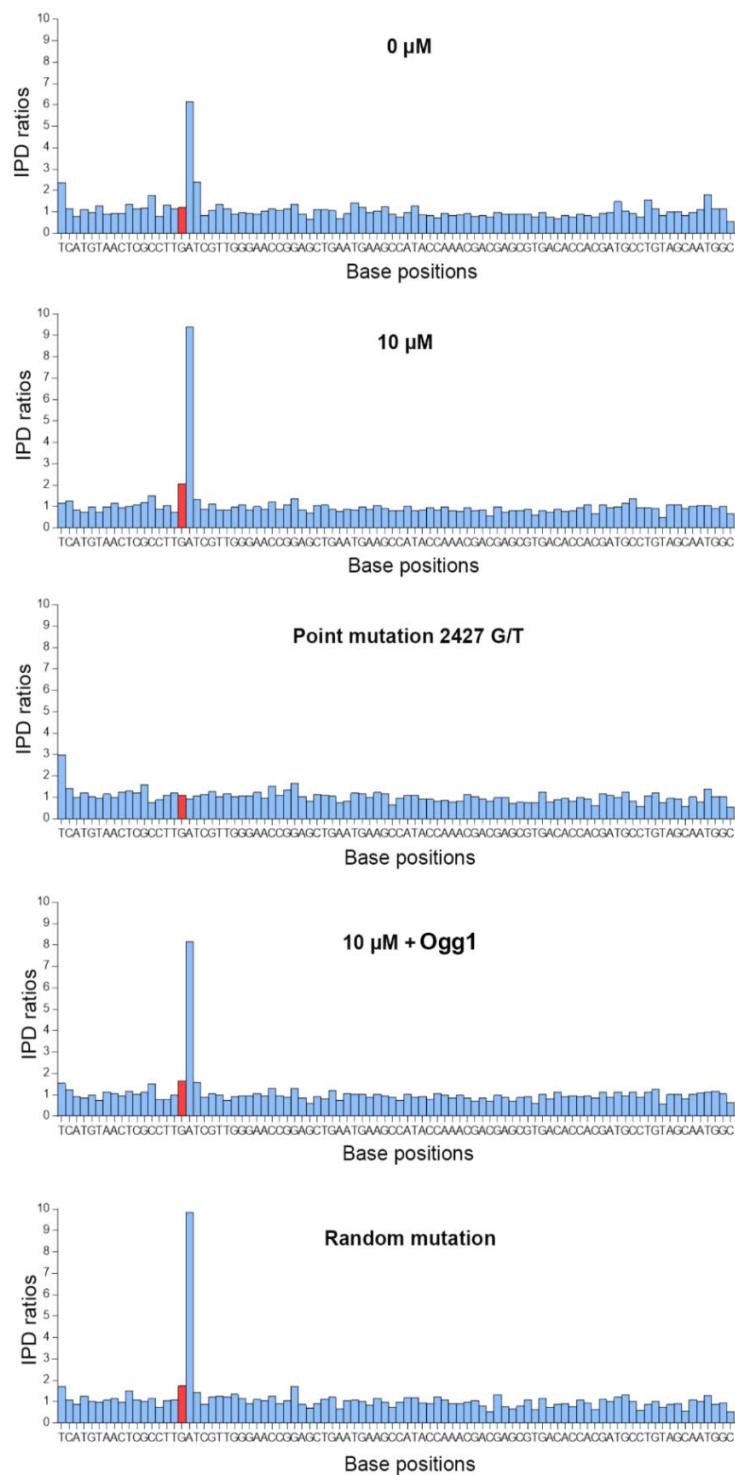

935

936 **Figure S3. IPD ratios of 8-OHdG and its surrounding bases in the plasmid genome.** Representative IPD ratio plots  
937 show one instance of 8-OHdG modification detected in WT, H<sub>2</sub>O<sub>2</sub>-treated, and H<sub>2</sub>O<sub>2</sub>-treated site-directed 2427 G/T  
938 mutation, Ogg1 and random mutation samples. No statistically significant modification signal was detected when G  
939 residue was mutated.

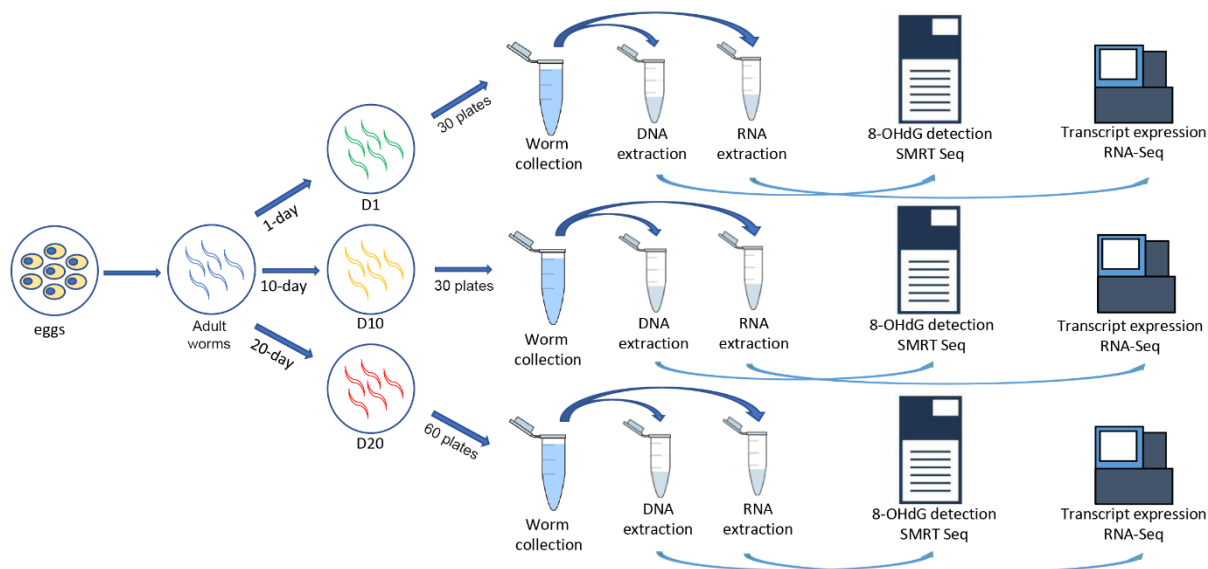

940  
 941 **Figure S4. The workflow of *C. elegans* sample preparation.** In brief, the adult worms were cultured into indicated  
 942 number of plates until the required time periods and collected for further experiments. To maintain the cultured  
 943 environment and worm batch between DNA and RNA samples consistent, the collected worms were subdivided into two  
 944 tubes for each DNA and RNA preparation. (n=30 plates for D1, n=30 plates for D10, and n=60 plates for D20,  
 945 respectively.)  
 946

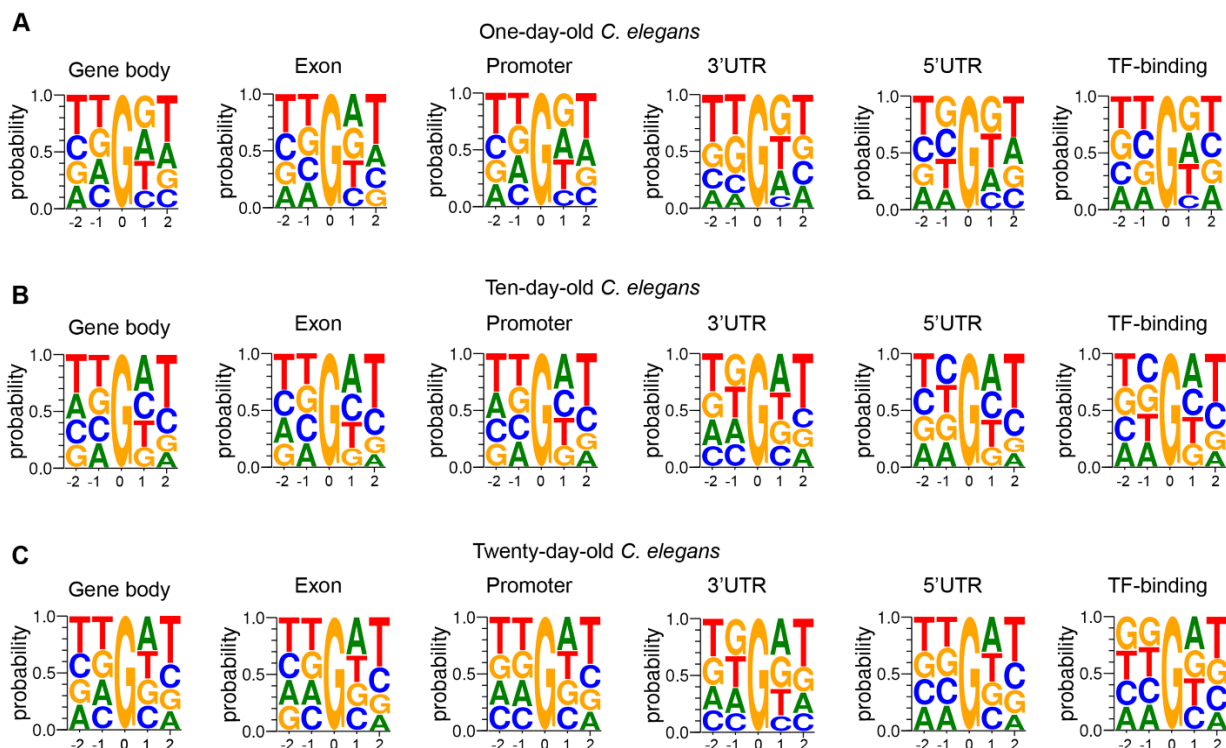

947  
 948 **Figure S5. Consensus sequence next to 8-OHdG detected in different genomic features of *C. elegans*.** A-C. Sequence  
 949 logo plots show the local sequence context (-2bp and +2bp) surrounding to 8-OHdG in different genomic features of  
 950 different age groups: 1-day-old *C. elegans* (A), 10-day-old *C. elegans* (B); and 20-day-old *C. elegans* (C).

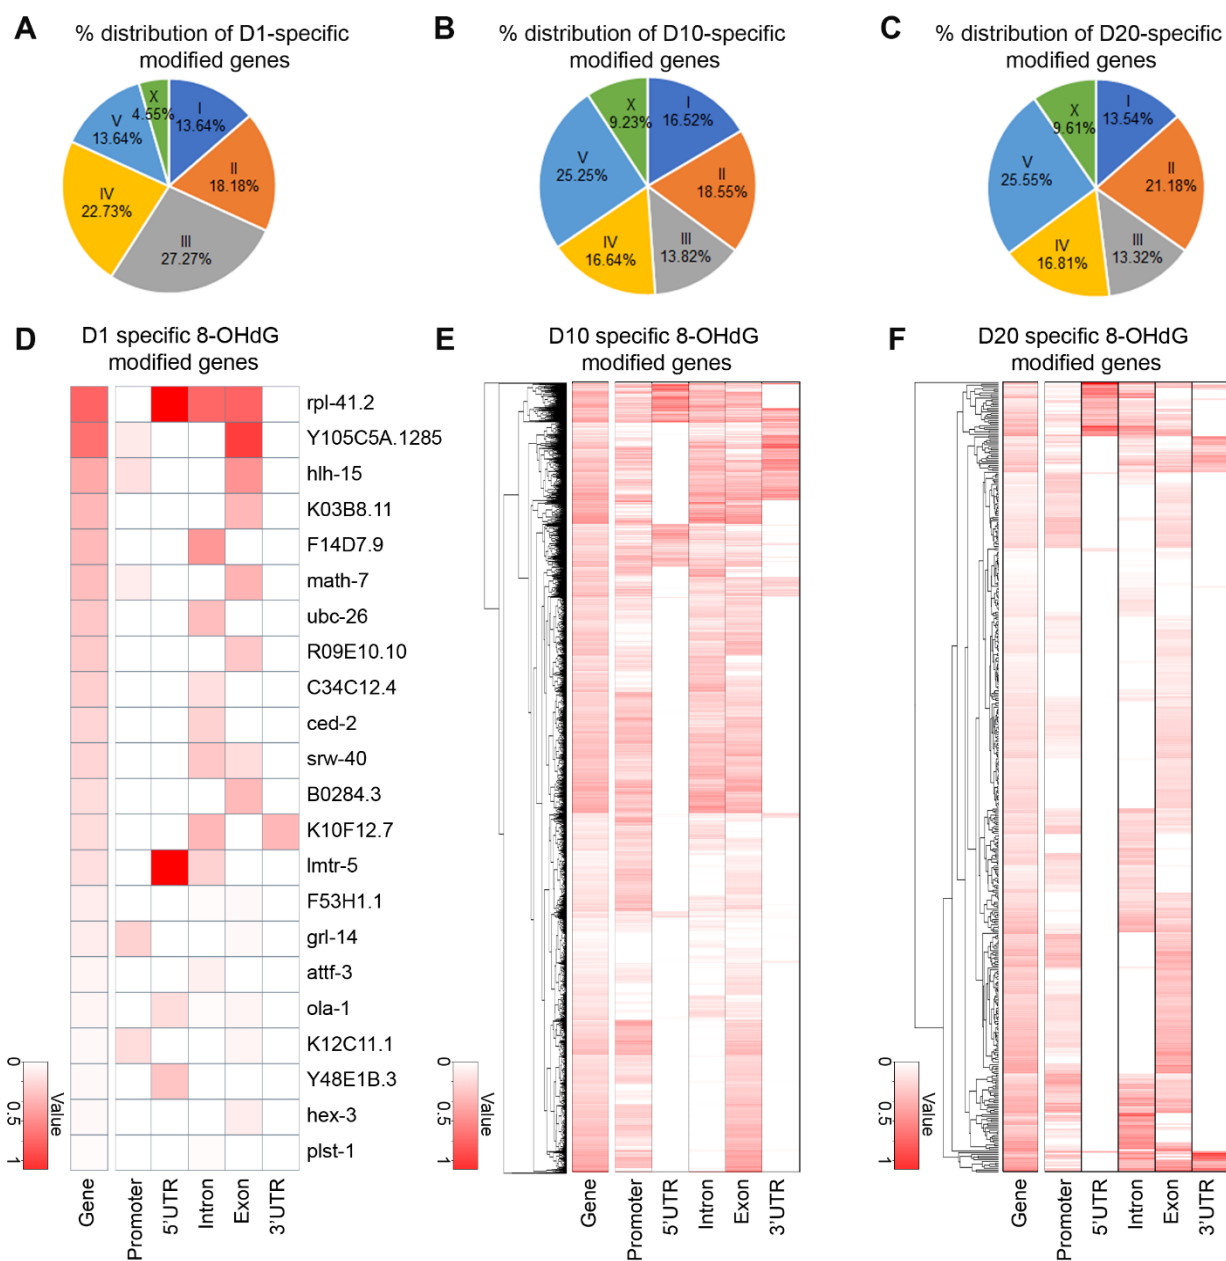

951

952 **Figure S6. Distribution of age-specific oxidatively modified genes.** A-C. The % distribution of age-specific 8-OHdG  
 953 modified genes across different chromosomes. D-F. Heatmap of 8-OHdG modification process in different genomic  
 954 regions. Genes exclusively oxidized in 1-day-old *C. elegans* (A, and D), those exclusively oxidized in 10-day-old *C.*  
 955 *elegans* (B, and E); those exclusively oxidized in 20-day-old *C. elegans* (C, and E). The 8-OHdG modification sites in  
 956 the whole length of the encoded gene were counted using customized Perl scripts and we assigned these genes as age-  
 957 specific only if the 8-OHdG sites in the gene region of exclusively in one sample but not in the other sample, with a  
 958 significant  $p$ -value  $< 0.05$  given by multiple *Fisher* exact test and a *Benjamini-Hochberg* false discovery rate (FDR)  $<$   
 959  $0.05$ . The differential oxidation coordinates were identified by the number of 8-OHdG sites in 100 kb-length within the  
 960 indicated regions. The color key from white to red indicates 8-OHdG level from low to high, respectively.

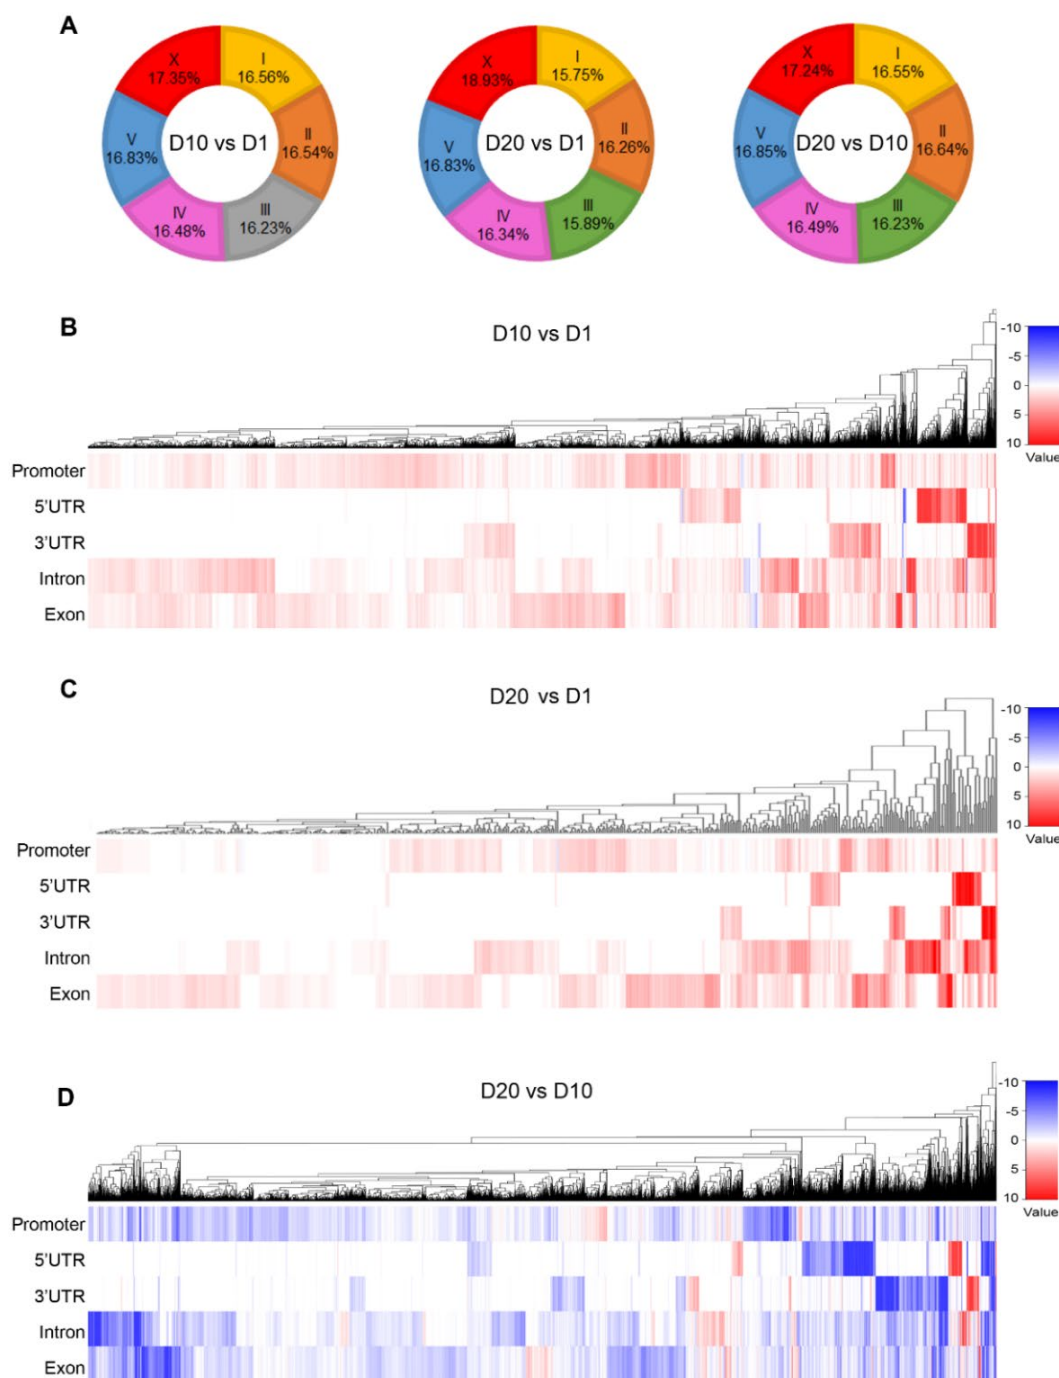

962

963 **Figure S7. Genomic distribution of differential 8-OHdG modified genes.** **A.** The proportion of differential 8-OHdG  
964 modified genes (DOGs) captured in each chromosome. DOGs were identified by comparing the number of 8-OHdG sites  
965 observed in the same gene annotated between two samples. The 8-OHdG modification sites in the whole length of the  
966 encoded gene were counted using customized Perl scripts and we assigned these genes as DOGs only if the 8-OHdG sites  
967 in the gene region of one sample was greater than or less than that of another sample, with a significant  $p$ -value  $< 0.05$   
968 given by multiple *Fisher* exact test and a *Benjamini-Hochberg* false discovery rate (FDR)  $< 0.05$ . **B-D.** Heatmap of  
969 differential 8-OHdG modification process in different genomic regions analyzed between D10 vs D1 (B), between D20  
970 vs D1 (C), and between D20 vs D10 (D). The differential oxidation coordinates were identified by the number of 8-OHdG  
971 in 100 kb-length within the indicated regions with a *Benjamini-Hochberg* false discovery rate (FDR)  $< 0.05$ . The color  
972 key from blue to red indicates 8-OHdG level from low to high, respectively.

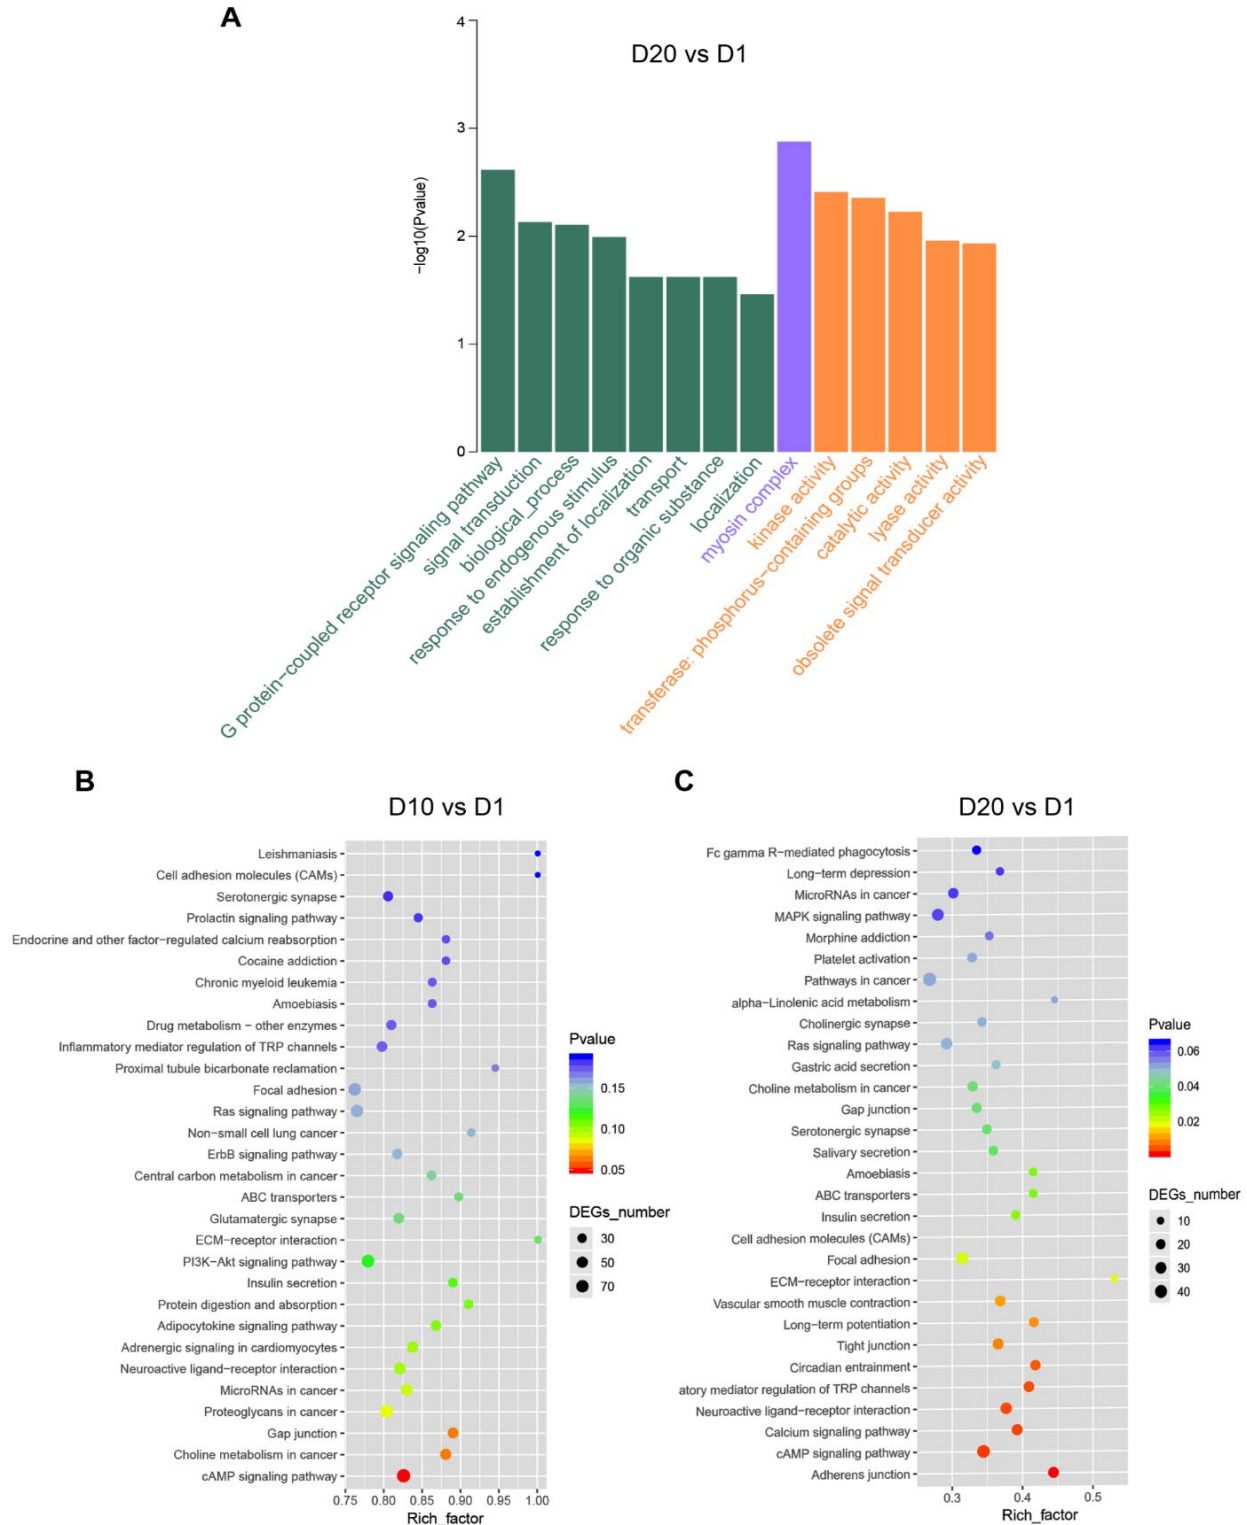

973

974 **Figure S8. Functional annotations for differentially 8-OHdG modified genes (DOGs).** GO (Gene ontology, A) and  
 975 KEGG (Kyoto Encyclopedia of Genes and Genomes, B and C) analysis for DOGs (fold change modification bases in  
 976 each gene between D10 vs. D1 or D20 vs. D1).  
 977



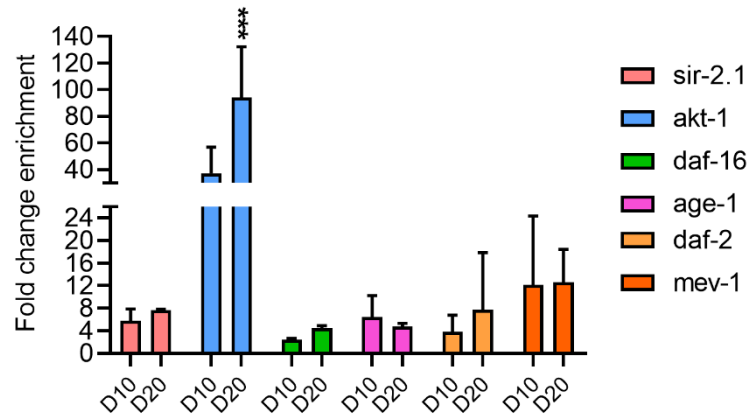

978  
979  
980  
981  
982  
983

**Figure S9. 8-OHdG modification in 6 longevity regulating genes.** Validation of the 6 identified 8-OHdG modified longevity regulating genes loci from SMRT sequencing by 8-OHdG-IP-qPCR assay (n=3). *Act-1* was used as a negative control. Fold change enrichment is identified by comparing with expression level in D1 samples. Results are represented as mean  $\pm$  SEM. \*\*\* $P < 0.005$  compared to D10.

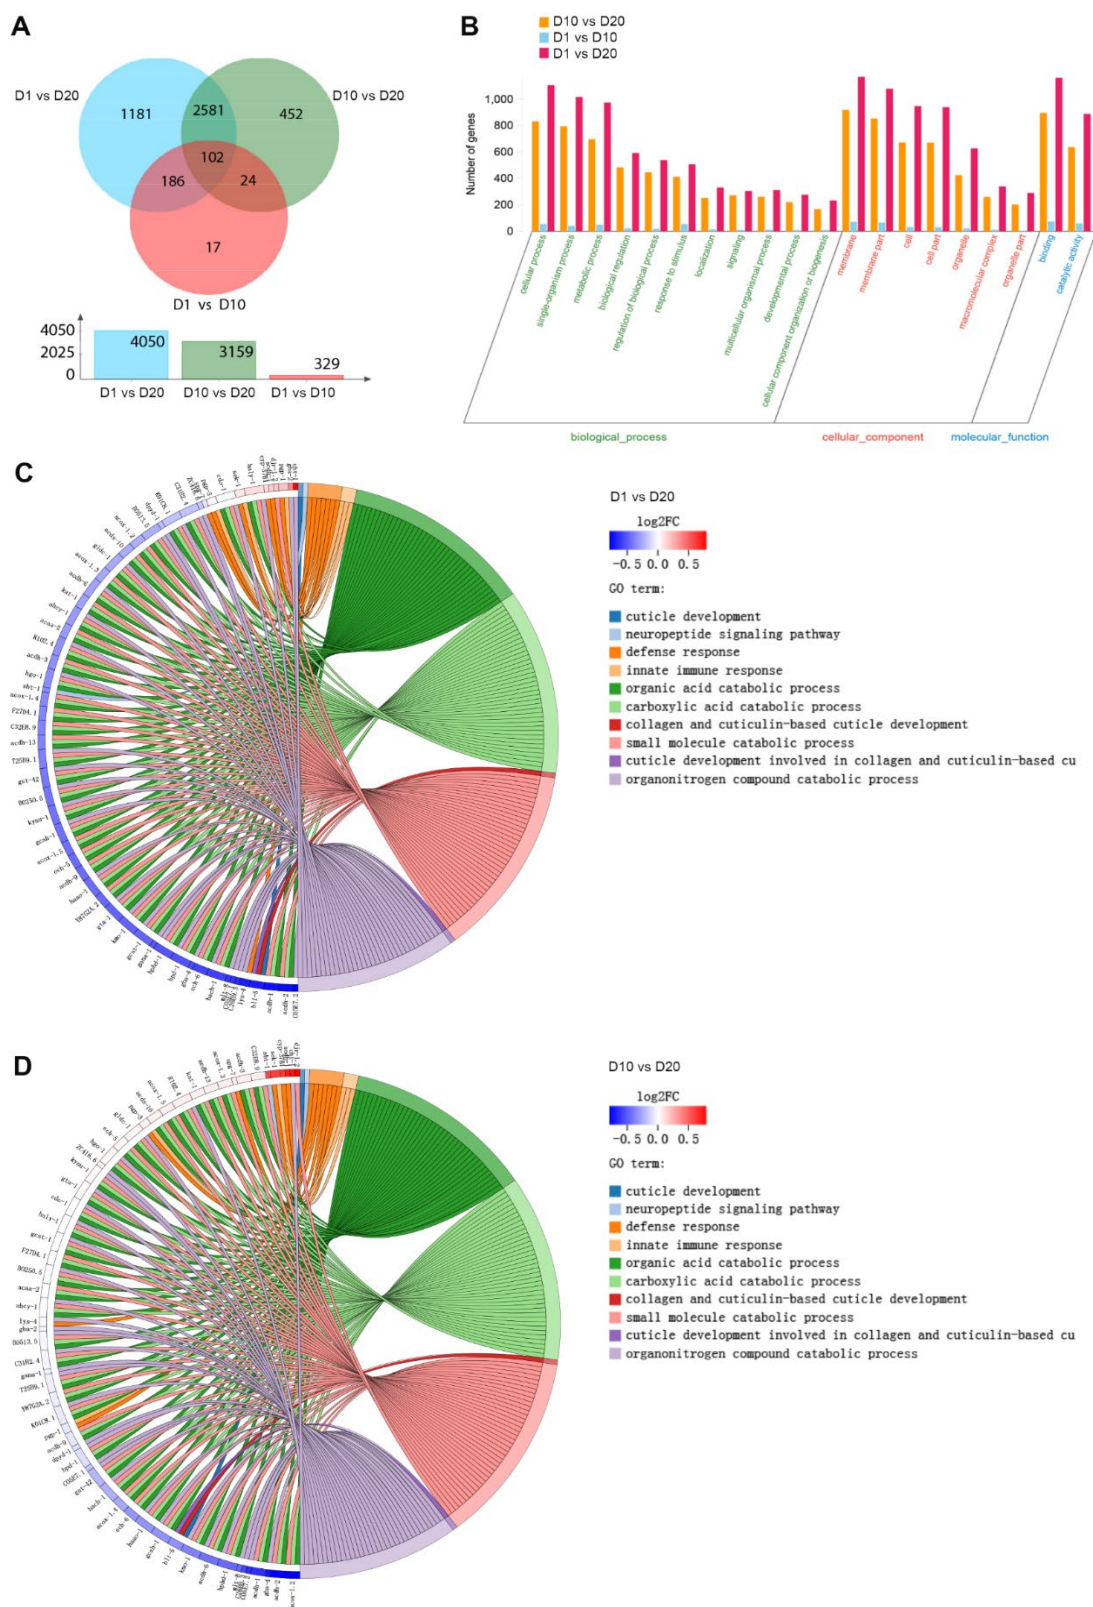

984

985 **Figure S10. The age-specific pattern of transcript expression in *C. elegans*.** A. Venn diagram comparison of transcript  
986 expressions in different samples. B. The GO pathway analysis of differentially transcribed genes among different samples.  
987 C and D. KEGG analysis of differentially transcribed genes between D1 vs. D20 (C) and D10 vs. D20 (D).

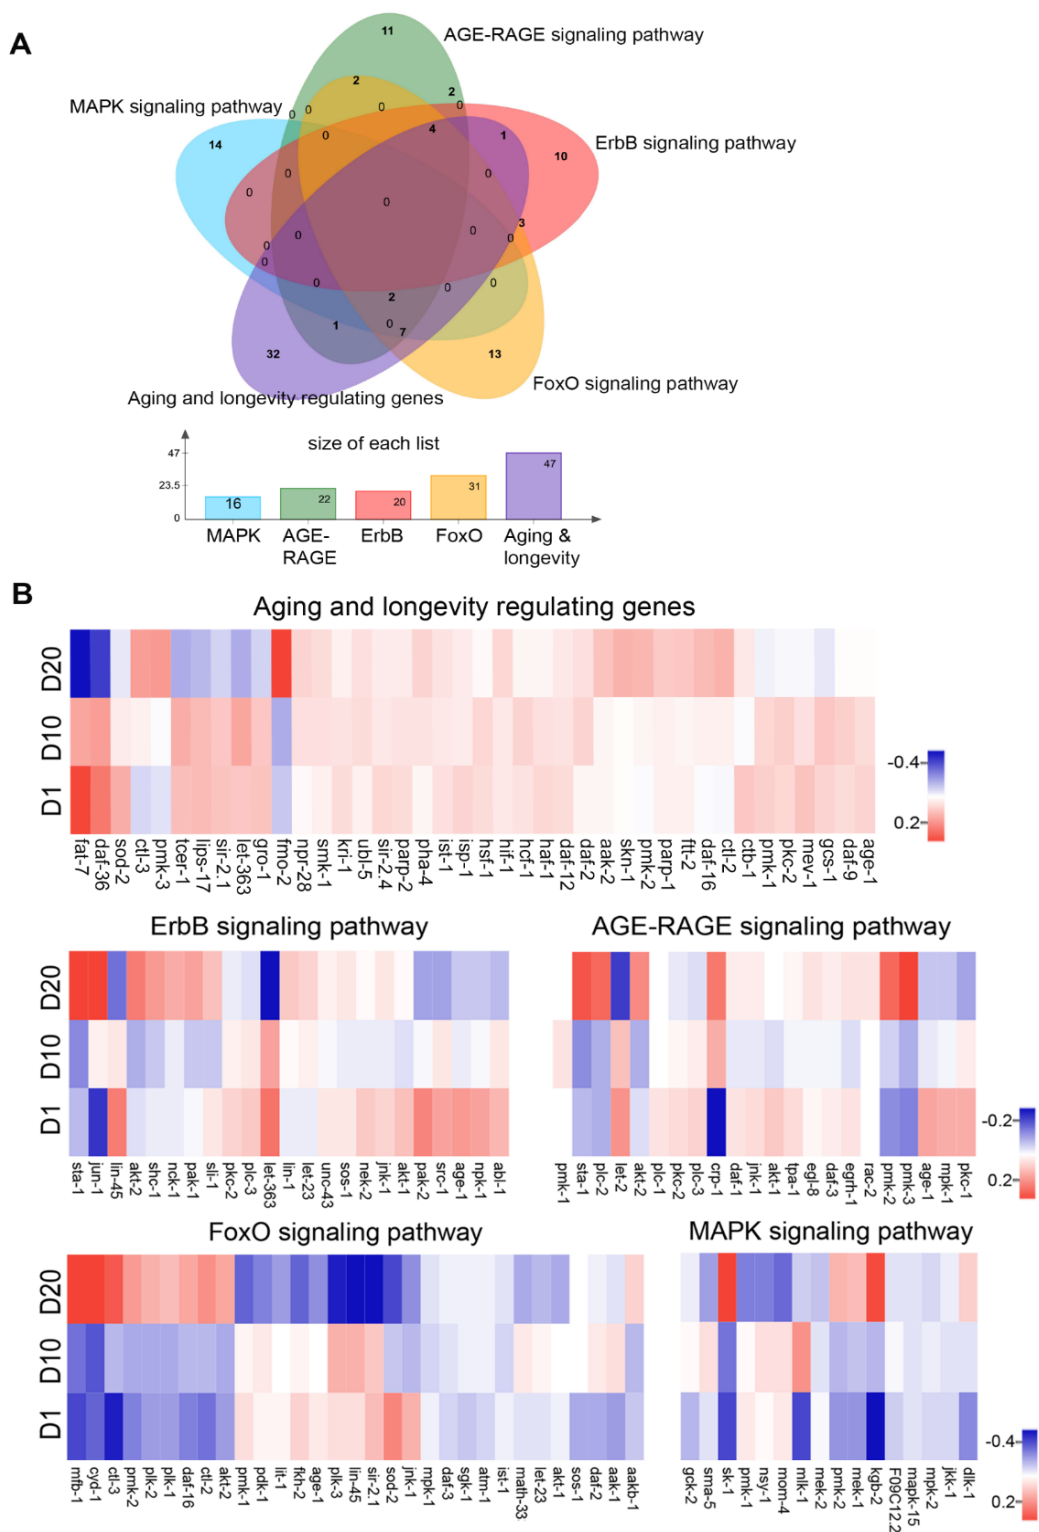

988

989 **Figure S11. The potential correlation between 8-OHdG modification and transcript dynamics of age-regulating**  
 990 **genes.** **A.** Venn diagram comparison of transcript expression levels for genes involved in key pathways enriched by DOG  
 991 (Fig.3F). **B.** Heatmap of transcript expression levels of DOG involved in top-5 pathways. The log<sub>2</sub> of the transcript  
 992 expression levels (RPKM) of RefSeq genes were calculated as described (Trapnell et al., 2012). The color key from blue  
 993 to red indicates the expression levels (RPKM) low to high, respectively.

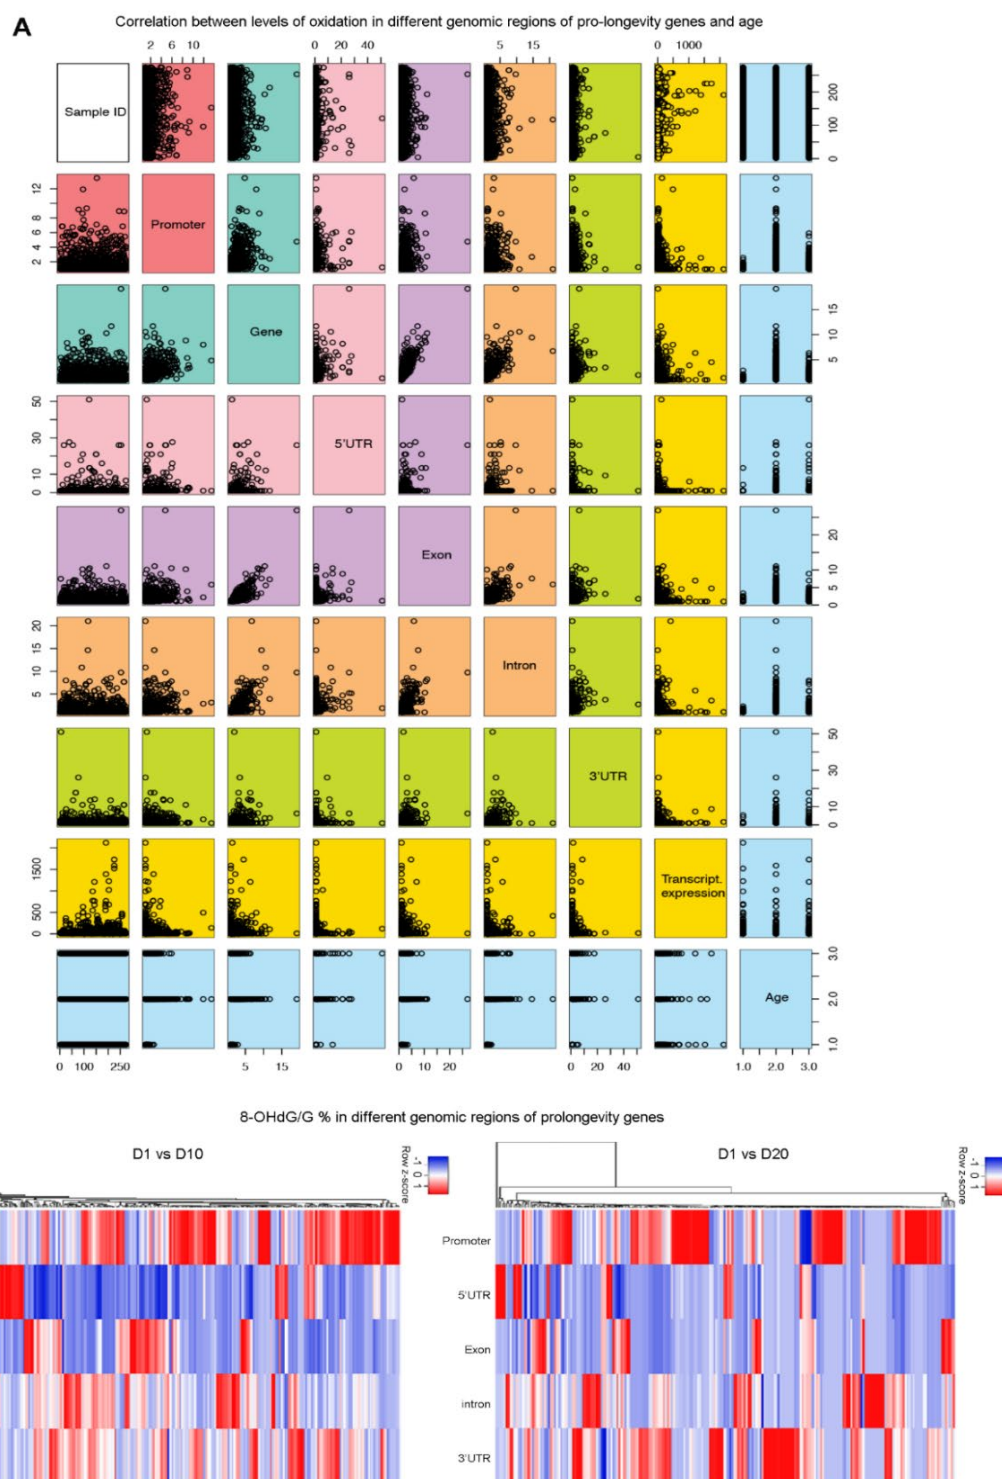

994

995 **Figure S12. Correlation analysis of 8-OHdG modification and transcript expression of pro-longevity genes.** A. Pair-  
 996 wise correlation analysis for 8-OHdG modification across different genomic regions and transcript expression of pro-  
 997 longevity genes with aging. The log<sub>2</sub> of the transcript expression levels (RPKM) of RefSeq genes were calculated as  
 998 described (Trapnell et al., 2012). The scatter-plot matrix is shown on the side of the diagonal. B. Heatmap showing the  
 999 genomic distribution of 8-OHdG in pro-longevity genes. The color key from blue to red indicates 8-OHdG level from  
 1000 low to high, respectively.

1001 **Supplementary tables**

1002 **Table S1: Summary of sequencing samples.**

| <b>Samples</b>                                                       | <b>Genome size</b> | <b>Library</b> | <b>Coverage per strand</b> | <b>Subread N50</b> | <b>Total Data (Gb)</b> |
|----------------------------------------------------------------------|--------------------|----------------|----------------------------|--------------------|------------------------|
| Synthetic oligonucleotide sequence                                   | 155 bp             | 155 bp         | ~340x                      | 953                | 0.4                    |
| Plasmid control                                                      | 5.4 kbp            | ~5 kb          | 1000x                      | 3,474              | 5.6                    |
| Plasmid treated with H <sub>2</sub> O <sub>2</sub>                   | 5.4 kbp            | ~5 kb          | 1000x                      | 1,577              | 0.3                    |
| Plasmid treated with H <sub>2</sub> O <sub>2</sub> and Ogg1          | 5.4 kbp            | ~5 kb          | 1000x                      | 1,387              | 5.5                    |
| Plasmid (G2427T mutation) treated with H <sub>2</sub> O <sub>2</sub> | 5.4 kbp            | ~5 kb          | 1000x                      | 3,403              | 8.4                    |
| Plasmid (random mutation) treated with H <sub>2</sub> O <sub>2</sub> | 5.4 kbp            | ~5 kb          | 1000x                      | 3,403              | 2.3                    |
| 1-day-old <i>C. elegans</i>                                          | 102 Mbp            | 10 kb          | 104x                       | 7,860              | 16.3                   |
| 10-day-old <i>C. elegans</i>                                         | 102 Mbp            | 10 kb          | 134x                       | 9,580              | 28.9                   |
| 20-day-old <i>C. elegans</i>                                         | 102 Mbp            | 10 kb          | 100x                       | 9,540              | 22.9                   |

1003 Summary of samples used in this study. The coverage for each sample was determined by the mean reference genome alignment  
1004 depth. All subread coverage were estimated using raw sequence data throughput and a genome size of 102 Mbp. Synthetic  
1005 oligonucleotide sequence was sequenced with P6-C4 chemistry in RSII platform, and all remaining samples were sequenced with  
1006 v2.1 chemistry in Sequel platform. 10 µM of H<sub>2</sub>O<sub>2</sub> was used for oxidative stress induction; 10 µg of Ogg1 was used for base  
1007 excision reaction.

1008

1009 **Table S2: Motif analysis of 8-OHdG sites in different age groups.** (Related to Figure 1)

1010

1011 **Table S3: Summary of 8-OHdG modified genes in the *C. elegans* Genome.** (Related to Figure  
1012 3)

1013

1014 **Table S4: Relative frequency of 8-OHdG modification identified in the different genomic  
1015 regions of one-day-old *C. elegans*.** (Related to Figure 3 and S6)

1016

1017 **Table S5: Relative frequency of 8-OHdG modification identified in the different genomic  
1018 regions of ten-day-old *C. elegans*.** (Related to Figure 3 and S6)

1019

1020 **Table S6: Relative frequency of 8-OHdG modification identified in the different genomic  
1021 regions of twenty-day-old *C. elegans*.** (Related to Figure 3 and S6)

1022

1023 **Table S7: Relative frequency of 8-OHdG modification identified in the different genomic  
1024 regions of longevity regulating genes.** (Related to Figure 5)

1025

1026 **Table S8: The Primers used for 8-OHdG-IP-qPCR.** (Related to Figure S9 and supplementary  
1027 methods)
